# Supplementary material
Source: publisher figshare collection journal article supplement (https://acs.figshare.com/ndownloader/files/5172289)

## *Supporting Information for Org. Lett.*

### **Intramolecular Catalytic Friedel–Crafts Reactions with Allenyl Cations for the Synthesis of Quinolines and Their Analogues**

Teruhiko Ishikawa<sup>†\*</sup>, Shinobu Manabe<sup>‡</sup>, Toshiaki Aikawa<sup>‡</sup>,  
Takayuki Kudo<sup>‡</sup>, and Seiki Saito<sup>‡\*</sup>

*Department of Bioscience and Biotechnology, School of Engineering<sup>‡</sup> and School of Education,<sup>†</sup>  
Okayama University, Tsushima, Okayama, Japan 700-8530*

E-mail: seisaito@biotech.okayama-u.ac.jp

### **Experimental Section**

**Instrumentation.** <sup>1</sup>H-NMR and <sup>13</sup>C-NMR spectra were recorded on a Varian Mercury-300 (300 MHz for proton and 75 MHz for carbon-13) instrument. The chemical shifts are given in  $\delta$  units relative to internal CHCl<sub>3</sub> (7.26 ppm for <sup>1</sup>H) or CDCl<sub>3</sub> (77 ppm for <sup>13</sup>C). All NMR experiments were performed using deuteriochloroform as a solvent unless otherwise indicated.

**Analytical Procedure and Data Presentation.** Analytical thin layer chromatography was performed on Merck pre-coated silica gel 60 F-254 (0.25 mm thickness). <sup>1</sup>H-NMR spectral data were indicated in the form:  $\delta$ -value of signal (peak multiplicity, integrated number of protons and coupling constant (if any)). Splitting patterns are abbreviated as follows: s, singlet; d, doublet; t, triplet; m, multiplet; b, broad.

**General Reaction Procedure.** All reactions, unless otherwise noted, were conducted under a nitrogen or an argon atmosphere. Liquid reagents were transferred via a dry hypodermic syringe from sure seal bottles to a reaction flask through a rubber septa wired on to the reaction flask. The septa can also serve to permit evacuation to eliminate air and introduce the inert gas by means of a steady stream of inert gas flowing system. Organic extracts were concentrated by evaporation with a rotary evaporator evacuated at around 60 mmHg. Column chromatography, unless otherwise specified, was performed on a Merck silica gel 60 7734 using an appropriate ratio of ethyl acetate-hexane mixed solvent and abbreviated as CC.

**Materials.** Unless otherwise noted, materials were obtained from commercial suppliers and reagent grade materials were used without further purification. Dimethyl sulfoxide (DMF) and dichloromethane (CH<sub>2</sub>Cl<sub>2</sub>) were freshly distilled from CaH<sub>2</sub> prior to use. Methanol (MeOH) and ethanol (EtOH) were distilled from magnesium turnings under argon. Tetrahydrofuran (THF) was distilled from benzophenone/ketyl prior to use.

***N*-(5-Trimethylsiloxy-5,5-diphenyl-3-pentynyl)-*N*-(*p*-toluenesulfonyl)-*m*-methoxyaniline (1a).** To a solution of *m*-anisidine (3.29 g, 26.7 mmol) in THF (30 ml) was added Et<sub>3</sub>N (4.46 mL, 32.0 mmol) followed by the addition of *p*-toluenesulfonyl chloride (5.09 g, 26.7 mmol) at room temperature. The mixture was stirred at room temperature for 15 h, quenched by the addition of water,

and extracted with AcOEt. The combined extracts were dried with Na<sub>2</sub>SO<sub>4</sub> and concentrated by a rotary evaporator to give an oil, which, on CC, gave *N*-tosylanisidine (**A**) as a yellow solid. (7.03 g, 95 %).

To a solution of **A** (1.52 g, 5.48 mmol) in THF (25 ml) were added triphenylphosphine (1.87 g, 7.12 mmol) and 3-butyne-1-ol (0.50 ml, 6.58 mmol) at room temperature followed by the addition of diethyl azodicarboxylate (1.04 ml, 6.58 mmol) dropwise at 0 °C. The mixture was stirred at room temperature for 15 min, quenched by the addition of water, and extracted with AcOEt. The combined extracts were dried with Na<sub>2</sub>SO<sub>4</sub> and concentrated by a rotary evaporator to give an oil, which, on CC, gave *N*-(3-butyne)-*N*-tosylanisidine (**B**) as a yellow oil. (980 mg, 54 %).

To a solution of **B** (442 mg, 1.34 mmol) in THF (5 ml) was added BuLi (1.05 ml, 1.61 mmol) dropwise at 0 °C followed by the addition of benzophenone (245 mg, 1.34 mmol) at 0 °C. The mixture was stirred at 0 °C for 30 min, quenched by the addition of water, and extracted with AcOEt. The combined extracts were dried with Na<sub>2</sub>SO<sub>4</sub> and concentrated by a rotary evaporator to give an oil, which, on CC, gave *N*-(5-hydroxy-5,5-diphenyl-3-pentynyl)-*N*-tosylanisidine (**C**) as a yellow oil. (531 mg, 77 %).

To a solution of **C** (531 mg, 1.04 mmol) in DMF (7 ml) were added imidazole (353 mg, 5.19 mmol) and chlorotrimethylsilane (0.33 ml, 2.59 mmol) at rt. The mixture was stirred at rt for 30 min, quenched by the addition of water, and extracted with AcOEt. The combined extracts were dried with Na<sub>2</sub>SO<sub>4</sub> and concentrated by a rotary evaporator to give an oil, which, on CC, gave **1a** as a white solid. (606 mg, 99 %); <sup>1</sup>H NMR δ 0.08 (s, 9H), 2.43 (s, 3H), 2.54 (t, 2H, *J* = 7.7 Hz), 3.69 (s, 3H), 3.54 (t, 2H, *J* = 7.7 Hz), 6.60–6.54 (m, 1H), 6.68 (t, 1H, *J* = 2.2 Hz), 6.86 (dd, 1H, *J* = 2.5, 8.2 Hz), 7.31–7.15 (m, 9H), 7.60–7.50 (m, 6H); <sup>13</sup>C NMR δ 1.6, 19.5, 21.5, 49.4, 55.3, 75.5, 84.6, 85.0, 114.2, 114.7, 120.4, 126.0, 127.0, 127.7, 127.9, 129.4, 129.6, 135.0, 139.8, 143.5, 146.7, 160.0; IR (neat) 2239, 1352 cm<sup>-1</sup>; *R*<sub>f</sub> = 0.70 (hexane : AcOEt = 3 : 1).

The following compounds (**1b–h**, **9**, **10**) were synthesized by the similar procedure as that for **1a**.

***N*-(5-Trimethylsiloxy-5,5-diphenyl-3-pentynyl)-*N*-(*p*-toluenesulfonyl)-*p*-methoxyaniline (**1b**).** <sup>1</sup>H NMR δ 0.14 (s, 9H), 2.48 (s, 3H), 2.61 (t, 2H, *J* = 7.7 Hz), 3.79 (t, 2H, *J* = 7.7 Hz), 3.85 (s, 3H), 6.8–6.83 (m, 2H), 7.03–6.98 (m, 2H), 7.38–7.23 (m, 8H), 7.63–7.54 (m, 6H); <sup>13</sup>C NMR δ 1.5, 19.5, 21.5, 49.6, 55.4, 75.5, 84.7, 84.9, 114.3, 126.0, 127.0, 127.7, 127.8, 129.4, 130.1, 131.1, 135.1, 143.4, 146.7, 159.1; IR (neat) 2242, 1350 cm<sup>-1</sup>; *R*<sub>f</sub> = 0.58 (hexane : AcOEt = 3 : 1).

***N*-(5-Trimethylsiloxy-5,5-diphenyl-3-pentynyl)-*N*-(*p*-toluenesulfonyl)-*m*-methylaniline (**1c**).** <sup>1</sup>H NMR δ 0.08 (s, 9H), 2.29 (s, 3H), 2.44 (s, 3H), 2.55 (t, 2H, *J* = 7.4 Hz), 3.76 (t, 2H, *J* = 7.4 Hz), 6.74–6.80 (m b, 1H), 6.95 (b, 1H), 7.14–7.39 (m, 10 H), 7.50–7.65 (m, 6H); <sup>13</sup>C NMR δ 1.6, 19.6, 21.2, 21.5, 49.5, 75.5, 84.7, 84.9, 125.3, 126.0, 127.0, 127.7, 127.9, 128.8, 129.0, 129.4, 130.0, 135.2, 138.6, 139.1, 143.5, 146.7; IR (neat) 2243, 1352 cm<sup>-1</sup>; *R*<sub>f</sub> = 0.67 (hexane : AcOEt = 3 : 1).

***N*-(6-Methyl-5-trimethylsiloxy-5-phenyl-3-heptynyl)-*N*-(*p*-toluenesulfonyl)-*m*-methylaniline (**1d**).** <sup>1</sup>H NMR (CDCl<sub>3</sub>) δ 0.02 (s, 9H), 0.73 (d, 3H, *J* = 6.9 Hz), 0.92 (d, 3H, *J* = 6.6 Hz), 1.92 (m, 1H), 2.31 (s, 3H), 2.43 (s, 3H), 2.56–2.49 (m, 2H), 3.77–3.69 (m, 2H), 6.82–6.75 (m, 1H), 6.99–6.96 (m, 1H) 7.31–7.09 (m, 7H), 7.52–7.45 (m, 4H); <sup>13</sup>C NMR δ 1.5, 17.5, 17.7, 19.5, 21.2, 21.5,

42.0, 49.7, 78.3, 83.4, 83.8, 125.2, 126.3, 126.8, 127.4, 127.7, 128.8, 129.0, 129.4, 130.0, 135.2, 138.7, 139.1, 143.4, 145.2; IR (neat) 2237, 1354  $\text{cm}^{-1}$ ;  $R_f$  = 0.57 (hexane : AcOEt = 3 : 1).

***N*-(5-Trimethylsiloxy-5-phenyl-3-hexynyl)-*N*-(*p*-toluenesulfonyl)-*m*-methoxyaniline (1e).**

$^1\text{H}$  NMR  $\delta$  0.12 (s, 9H), 1.68 (s, 3H), 2.45 (s, 3H), 2.56–2.48 (m, 2H), 3.77–3.69 (m, 5H), 6.63–6.59 (m, 1H), 6.70–6.68 (m, 1H), 7.35–7.21 (m, 8H), 7.60–7.51 (m, 5H);  $^{13}\text{C}$  NMR  $\delta$  1.7, 19.5, 21.5, 35.9, 49.6, 55.3, 71.2, 82.1, 85.9, 114.1, 114.8, 120.5, 125.0, 127.0, 127.7, 127.9, 129.4, 129.6, 135.2, 140.0, 143.5, 147.0, 160.0; IR (neat) 2240, 1352  $\text{cm}^{-1}$ ;  $R_f$  = 0.73 (hexane : AcOEt = 3 : 1).

***N*-(5-Trimethylsiloxy-5-phenyl-3-pentynyl)-*N*-(*p*-toluenesulfonyl)-*m*-methoxyaniline**

**(1f).**  $^1\text{H}$  NMR  $\delta$  0.16 (s, 9H), 2.41 (s, 3H), 2.45 (t, 2H,  $J$  = 7.8 Hz), 3.67 (t, 2H,  $J$  = 7.8 Hz), 3.70, (s, 3H), 5.41 (s, 1H), 6.53–6.64 (m, 2H), 6.81–6.86 (m, 1H), 7.14–7.52 (m, 10 H);  $^{13}\text{C}$  NMR  $\delta$  0.18, 19.5, 21.5, 49.6, 55.2, 64.6, 82.3, 82.6, 114.0, 114.8, 120.6, 126.3, 127.6, 127.7, 128.3, 129.4, 129.5, 135.2, 139.9, 141.5, 143.4, 159.9.

***N*-(5-Trimethylsiloxy-5,5-diphenyl-3-pentynyl)-*N*-(*p*-toluenesulfonyl)aniline (1g).**

$^1\text{H}$  NMR  $\delta$  0.06 (s, 9H), 2.41 (s, 3H), 2.54 (t, 2H,  $J$  = 7.7 Hz), 3.54 (t, 2H,  $J$  = 7.7 Hz), 7.07–7.00 (m, 2H), 7.32–7.15 (m, 11H), 7.54–7.45 (m, 6H);  $^{13}\text{C}$  NMR  $\delta$  1.6, 19.6, 21.5, 49.5, 84.6, 85.0, 126.0, 127.0, 127.7, 127.9, 128.1, 128.8, 129.1, 129.4, 135.1, 138.8, 143.5, 146.7; IR (KBr) 2243, 1339  $\text{cm}^{-1}$ ;  $R_f$  = 0.67 (hexane : AcOEt = 3 : 1).

***N*-(5-Trimethylsiloxy-5,5-diphenyl-3-pentynyl)-*N*-(*p*-toluenesulfonyl)-*m*-chloroaniline**

**(1h).**  $^1\text{H}$  NMR  $\delta$  0.08 (s, 9H), 2.44 (s, 3H), 2.55 (t, 2H,  $J$  = 7.1 Hz), 3.74 (t, 2H,  $J$  = 7.1 Hz), 6.98–6.93 (m, 1H), 7.06 (t, 1H,  $J$  = 2.2 Hz), 7.32–7.17 (m, 10H), 7.56–7.46 (m, 6H), 7.60–7.51 (m, 5H);  $^{13}\text{C}$  NMR  $\delta$  1.7, 19.6, 21.5, 49.3, 84.3, 85.2, 125.9, 126.97, 127.03, 127.6, 127.9, 128.4, 128.9, 129.5, 130.0, 134.5, 134.6, 140.0, 143.9, 146.6; IR (neat) 2240, 1354  $\text{cm}^{-1}$ ;  $R_f$  = 0.70 (hexane : AcOEt = 3 : 1).

***N*-(7-Trimethylsiloxy-6,6-diphenyl-4-hexynyl)-*N*-(*p*-toluenesulfonyl)-*m*-methoxyaniline**

**(9).**  $^1\text{H}$  NMR  $\delta$  0.05 (s, 9H), 1.75 (quin, 2H,  $J$  = 7.1 Hz), 2.44–2.37 (m, 5H), 3.62 (t, 2H,  $J$  = 6.3 Hz), 3.71 (s, 3H), 6.56–6.52 (m, 1H), 6.66–6.62 (m, 1H), 6.8–6.60 (m, 1H), 7.27–7.11 (m, 9H), 7.52–7.43 (m, 6H);  $^{13}\text{C}$  NMR  $\delta$  1.5, 16.2, 21.5, 27.4, 49.9, 55.2, 75.5, 83.8, 87.3, 113.8, 114.7, 120.4, 125.9, 126.9, 127.7, 129.3, 129.5, 135.0, 140.3, 143.3, 146.9, 159.9 ; IR (neat) 2235, 1352  $\text{cm}^{-1}$ ;  $R_f$  = 0.63 (hexane : AcOEt = 3 : 1).

***N*-(7-Trimethylsiloxy-7,7-diphenyl-5-heptynyl)-*N*-(*p*-toluenesulfonyl)-*m*-methoxyaniline**

**(10).**  $^1\text{H}$  NMR  $\delta$  0.07 (s, 9H), 1.70–1.51 (m, 4H), 2.42 (s, 3H), 3.00 (s, 3H), 3.58–3.50 (m, 2H), 3.72 (s, 3H), 6.65–6.57 (m, 2H), 6.86–6.80 (m, 1H), 7.29–7.13 (m, 9H), 7.63–7.48 (m, 6H);  $^{13}\text{C}$  NMR  $\delta$  1.5, 18.4, 21.5, 25.2, 27.4, 49.8, 55.2, 75.5, 83.5, 88.1, 113.6, 114.6, 120.5, 125.9, 126.8, 127.7, 127.8, 129.3, 129.4, 135.1, 140.1, 143.3, 147.0, 159.8; IR (neat) 2235, 1350  $\text{cm}^{-1}$ ;  $R_f$  = 0.67 (hexane : AcOEt = 3:1).

**7-Methoxy-4-(2,2-diphenylvinylidene)-1-(*p*-toluenesulfonyl)-1,2,3,4-tetrahydroquinoline**

**(2a).** To a solution of **1a** (60 mg, 0.10 mmol) in  $\text{CH}_2\text{Cl}_2$  (1.5 ml) was added  $\text{BF}_3 \cdot \text{OEt}_2$  (0.0026 ml, 0.021 mmol) dropwise at 0 °C. The mixture was stirred at 0 °C for 10 min, neutralized with aqueous  $\text{NaHCO}_3$  at 0 °C, and extracted with AcOEt. The combined extracts were dried with  $\text{Na}_2\text{SO}_4$  and

concentrated by a rotary evaporator to give a yellow gum, which, on CC, gave a mixture of **2a** and **3a** (10:1, inseparable by SiO<sub>2</sub> column) as a white solid (49 mg, 99 %); **2a**: <sup>1</sup>H NMR δ 2.38 (s, 3H), 2.47–2.40 (m, 2H), 3.84 (s, 3H), 4.00–3.93 (m, 2H), 6.73 (dd, 1H, *J* = 2.8, 8.8 Hz), 7.45–7.11 (m, 14H), 7.57–7.52 (m, 2H); <sup>13</sup>C NMR δ 21.6, 25.6, 45.7, 55.5, 100.2, 110.0, 113.6, 114.0, 117.0, 126.7, 127.0, 127.5, 127.9, 128.2, 128.3, 128.4, 129.7, 136.5, 136.7, 137.4, 143.7, 159.0, 204.5; IR (neat) 1356 cm<sup>-1</sup>; *R<sub>f</sub>* = 0.50 (hexane : AcOEt = 3 : 1).

The following compounds (**2b**—**egh**, **11a**, **12**) were synthesized by the similar procedure as that for **2a** and were obtained as a mixture of 7- (**2**) and 5-substituted (**3**) isomers except for **2bg**. These mixtures were inseparable by SiO<sub>2</sub> column chromatography. The spectroscopic data only for the major isomer (**2**) were listed, which were carefully read from the corresponding spectra of the mixtures.

**6-Methoxy-4-(2,2-diphenylvinylidene)-1-(*p*-toluenesulfonyl)-1,2,3,4-tetrahydroquinoline (2b).** <sup>1</sup>H NMR δ 2.44–2.36 (m, 5H), 3.76 (s, 3H), 3.96–3.90 (m, 2H), 6.83 (dd, 1H, *J* = 2.7, 9.1 Hz), 7.03 (d, 1H, *J* = 2.8 Hz), 7.36–7.17 (m, 12H), 7.52–7.46 (m, 2H), 7.73 (d, 1H, *J* = 9.1 Hz); <sup>13</sup>C NMR δ 21.6, 25.0, 45.5, 55.3, 100.3, 110.8, 114.0, 114.3, 126.4, 127.1, 127.6, 128.1, 128.3, 128.4, 129.1, 129.7, 136.0, 137.4, 143.6, 157.4, 205.1; IR (neat) 1350 cm<sup>-1</sup>; *R<sub>f</sub>* = 0.55 (hexane : AcOEt = 3 : 1). Exact Mass: exact mass, *m/z* 493.17122 (calcd for C<sub>31</sub>H<sub>27</sub>NO<sub>3</sub>S *m/z* 493.17116). Anal. Calcd for C<sub>31</sub>H<sub>27</sub>NO<sub>3</sub>S: C, 75.43; H, 5.51; N, 2.84. Found: C, 75.30; H, 5.50; N, 2.80.

**7-Methyl-4-(2,2-diphenylvinylidene)-1-(*p*-toluenesulfonyl)-1,2,3,4-tetrahydroquinoline (2c).** <sup>1</sup>H NMR δ 2.37 (s, 3H), 2.38 (s, 3H), 2.47–2.40 (m, 2H), 3.96–3.89 (m, 2H), 6.98–6.93 (m, 1H), 7.49–7.07 (m, 12H), 7.42 (d, 1H, *J* = 8.0 Hz), 7.57–7.50 (m, 2H), 7.63 (s, 1H); <sup>13</sup>C NMR δ 21.4, 21.5, 25.5, 45.5, 100.3, 110.8, 114.0, 121.9, 126.5, 126.7, 126.97, 127.01, 127.3, 127.5, 128.28, 128.33, 128.4, 129.59, 129.64, 135.6, 136.3, 137.5, 137.9, 143.6, 204.8; IR (neat) 1356 cm<sup>-1</sup>; *R<sub>f</sub>* = 0.67 (hexane : AcOEt = 3 : 1).

**4-(2-Isopropyl-2-phenylvinylidene)-7-methyl-1-(*p*-toluenesulfonyl)-1,2,3,4-tetrahydroquinoline (2d).** <sup>1</sup>H NMR δ 0.99 (d, 3H, *J* = 6.3 Hz), 1.07 (d, 3H, *J* = 6.6 Hz), 2.40–2.29 (m, 8H), 2.96–2.82 (m, 1H), 4.10–3.78 (m, 2H), 6.97–6.92 (m, 1H), 7.36–7.18 (m, 8H), 7.54–7.48 (m, 2H), 7.63 (s, 1H); <sup>13</sup>C NMR δ 21.3, 21.5, 22.2, 22.4, 25.4, 29.1, 45.7, 101.2, 117.6, 123.1, 126.2, 126.4, 126.6, 126.8, 126.9, 127.0, 127.1, 128.4, 128.4, 129.6, 135.3, 136.0, 137.4, 137.5, 143.5, 201.9; IR (neat) 1348 cm<sup>-1</sup>; *R<sub>f</sub>* = 0.57 (hexane : AcOEt = 3 : 1).

**7-Methoxy-4-(2-methyl-2-phenylvinylidene)-1-(*p*-toluenesulfonyl)-1,2,3,4-tetrahydroquinoline (2e).** <sup>1</sup>H NMR δ 2.10 (s, 3H), 2.3–2.32 (m, 2H), 2.42 (s, 3H), 3.83 (s, 3H), 4.04–3.86 (m, 2H), 6.70 (dd, 1H, *J* = 8.8, 2.7 Hz), 7.40–7.13 (m, 9H), 7.60–7.54 (m, 2H); <sup>13</sup>C NMR δ 16.7, 21.6, 25.5, 45.9, 55.5, 98.9, 104.8, 109.9, 113.5, 117.8, 118.3, 125.67, 125.74, 126.1, 126.9, 127.06, 127.13, 128.0, 128.1, 128.3, 129.7, 136.5, 137.4, 143.7, 158.7, 202.6; IR (neat) 1352 cm<sup>-1</sup>; *R<sub>f</sub>* = 0.53 (hexane : AcOEt = 3 : 1).

**4-(2,2-Diphenylvinylidene)-1-(*p*-toluenesulfonyl)-1,2,3,4-tetrahydroquinoline (2g).** <sup>1</sup>H NMR δ 2.37 (s, 3H), 2.51–2.45 (m, 2H), 4.00–3.93 (m, 2H), 7.36–7.09 (m, 14H), 7.56–7.50 (m, 3H), 7.79 (dd, 1H, *J* = 1.4, 8.2 Hz); <sup>13</sup>C NMR δ 21.6, 25.7, 45.5, 100.4, 114.1, 124.9, 125.8, 126.1, 126.95, 127.04, 127.6, 127.8, 128.3, 128.4, 129.7, 135.8, 136.1, 137.4, 143.7, 205.1; IR (CHCl<sub>3</sub>) 1356 cm<sup>-1</sup>; *R<sub>f</sub>* = 0.67 (hexane : AcOEt = 3 : 1). Exact Mass: exact mass, *m/z* 463.16045 (calcd for C<sub>30</sub>H<sub>25</sub>NO<sub>2</sub>S *m/z*

463.16060). Anal. Calcd for  $C_{30}H_{25}NO_2S$ : C, 77.72; H, 5.44; N, 3.02. Found: C, 77.58; H, 5.31; N, 2.99.

**7-Chlolo-4-(2,2-diphenylvinylidene)-1-(*p*-toluenesulfonyl)-1,2,3,4-tetrahydroquinoline (2h).**  $^1H$  NMR  $\delta$  2.38 (s, 3H), 2.50–2.41 (m, 2H), 3.97–3.88 (m, 2H), 7.50–7.05 (m, 13H), 7.84 (d, 1H,  $J = 1.9$  Hz), 7.53–7.11 (m, 12H), 7.49–7.42 (m, 2H), 7.68 (d, 2H);  $^{13}C$  NMR  $\delta$  21.6, 25.0, 45.5, 55.3, 100.3, 110.8, 114.0, 114.3, 126.4, 127.1, 127.7, 127.9, 128.1, 128.3, 129.1, 129.7, 136.1, 137.4, 143.6, 157.4, 205.1; IR ( $CHCl_3$ )  $1358\text{ cm}^{-1}$ ;  $R_f = 0.60$  (hexane : AcOEt = 3 : 1).

**8-Methoxy-5-(2,2-diphenylvinylidene)-1-(*p*-toluenesulfonyl)-2,3,4,5-tetrahydro-1-benzazepine (11a).**  $^1H$  NMR  $\delta$  2.01 (quin, 2H,  $J = 6.0$  Hz), 2.37 (s, 3H), 2.51–2.44 (m, 2H), 3.74 (s, 3H), 3.88 (t, 2H,  $J = 6.0$  Hz), 6.71 (dd, 1H,  $J = 2.5, 8.5$  Hz), 6.97 (d, 1H,  $J = 2.5$  Hz), 7.12 (d, 1H,  $J = 8.0$  Hz), 7.40–7.26 (m, 11H), 7.75–7.49 (m, 2H);  $^{13}C$  NMR  $\delta$  21.5, 28.2, 29.6, 50.6, 55.3, 107.2, 110.3, 112.6, 113.5, 126.0, 127.2, 127.3, 128.4, 128.4, 129.6, 130.7, 136.8, 138.2, 139.0, 143.3, 159.0, 206.3; IR (neat)  $1346\text{ cm}^{-1}$ ;  $R_f = 0.47$  (hexane : AcOEt = 3 : 1). Exact Mass: exact mass,  $m/z$  507.18677 (calcd for  $C_{32}H_{29}NO_3S$   $m/z$  507.18681). Anal. Calcd for  $C_{32}H_{29}NO_3S$ : C, 75.71; H, 5.76; N, 2.76. Found: C, 75.77; H, 5.71; N, 2.74.

**9-Methoxy-6-(2,2-diphenylvinylidene)-1-(*p*-toluenesulfonyl)-1,2,3,4,5,6-hexahydro-2-benzazocine (12).**  $^1H$  NMR  $\delta$  1.67–1.56 (m, 2H), 1.99–1.87 (m, 2H), 2.43 (s, 3H), 3.12–3.04 (m, 2H), 3.61 (s, 3H) 3.69–3.63 (m, 2H), 6.26 (d, 1H,  $J = 2.7$  Hz), 6.79 (dd, 1H,  $J = 2.7, 9.1$  Hz), 7.45–7.23 (m, 12H), 7.55 (d, 2H,  $J = 8.8$  Hz), 7.78–7.73 (m, 2H);  $^{13}C$  NMR  $\delta$  21.5, 23.9, 27.6, 31.2, 51.3, 55.2, 107.8, 109.8, 113.6, 115.0, 127.1, 127.6, 128.3, 128.4, 129.6, 129.8, 130.7, 136.4, 136.8, 137.7, 143.3, 159.2, 208.4; IR ( $CHCl_3$ )  $1346\text{ cm}^{-1}$ ;  $R_f = 0.38$  (hexane : AcOEt = 3:1). Exact Mass: exact mass,  $m/z$  521.20233 (calcd for  $C_{33}H_{31}NO_3S$   $m/z$  521.20246). Anal. Calcd for  $C_{33}H_{31}NO_3S$ : C, 75.98; H, 5.99; N, 2.68. Found: C, 75.79; H, 6.06; N, 2.54.

**7-Methoxy-4-(2,2-diphenylvinyl)-1-(*p*-toluenesulfonyl)-1,2-dihydroquinoline (4a).** To a solution of **1a** (75 mg, 0.13 mmol) in  $CH_2Cl_2$  (1.5 ml) was added  $BF_3 \cdot OEt_2$  (0.0033 ml, 0.026 mmol) at 0 °C. The mixture was stirred at 0 °C for 1 h, neutralized with aqueous  $NaHCO_3$  at 0 °C, and extracted with AcOEt. The combined extracts were dried with  $Na_2SO_4$  and concentrated by a rotary evaporator to give an oil, which, on CC, gave a mixture of **4a** and **5a** (10 : 1; inseparable by  $SiO_2$  column) as a yellow oil. (63 mg, 99 %). Data for **4a**:  $^1H$  NMR  $\delta$  2.46 (s, 3H), 3.88 (s, 3H), 4.16–4.09 (m, 2H), 4.95–4.90 (m, 1H), 5.86–5.83 (m, 1 H), 6.78 (dd, 1H,  $J = 2.8, 8.5$  Hz), 7.05–7.00 (m, 2H), 7.25–7.10 (m, 8H), 7.50–7.26 (m, 6H);  $^{13}C$  NMR  $\delta$  21.5, 45.3, 55.6, 112.0, 113.2, 120.4, 124.2, 124.3, 125.6, 127.3, 127.4, 127.5, 127.6, 127.7, 127.8, 128.06, 128.13, 129.0, 129.7, 133.6, 136.1, 136.8, 139.6, 142.6, 143.2, 145.5, 159.3; IR ( $CHCl_3$ )  $1352\text{ cm}^{-1}$ ;  $R_f = 0.50$  (hexane : AcOEt = 3 : 1). **4-(2,2-Diphenylvinyl)-1-(*p*-toluenesulfonyl)-1,2-dihydroquinoline (4g).** To a solution of **2g** (65 mg, 0.14 mmol) in EtOH (5 ml) was added *p*-toluenesulfonic acid monohydrate (27 mg, 0.14 mmol) at room temperature. The mixture was stirred at 78 °C for 24 h, neutralized with aqueous  $NaHCO_3$  at 0 °C, and extracted with AcOEt. The combined extracts were dried with  $Na_2SO_4$  and concentrated by a rotary evaporator to give an oil, which, on CC, gave **4g** as a yellow gum (64 mg, 99 %);  $^1H$  NMR  $\delta$  2.47 (s, 3H), 4.18–4.13 (m, 2H), 5.10–5.04 (m, 1H), 5.88–5.84 (m, 1H), 7.08–7.00 (m, 2H), 7.37–7.10

(m, 15H), 7.74–7.69 (m, 1H);  $^{13}\text{C}$  NMR  $\delta$  21.5, 45.2, 123.2, 123.9, 124.6, 126.8, 127.1, 127.4, 127.5, 127.7, 127.8, 128.08, 128.13, 128.2, 129.0, 129.7, 131.3, 133.8, 135.4, 136.1, 139.5, 142.5, 143.2, 145.6; IR (neat) 1354  $\text{cm}^{-1}$ ;  $R_f$  = 0.67 (hexane : AcOEt = 3 : 1). Exact Mass: exact mass,  $m/z$  463.16066 (calcd for  $\text{C}_{30}\text{H}_{25}\text{NO}_2\text{S}$   $m/z$  463.16060). Anal. Calcd for  $\text{C}_{30}\text{H}_{25}\text{NO}_2\text{S}$ : C, 77.72; H, 5.44; N, 3.02. Found: C, 77.61; H, 5.42; N, 3.10.

The following compound was prepared in a similar way as that described for **4g**.

**5-(2,2-Diphenylvinyl)-8-methoxy-1-*p*-toluenesulfonyl-2,3-dihydro-1-benzazepine (11b).**

$^1\text{H}$  NMR ( $\text{CDCl}_3$ )  $\delta$  2.06–1.98 (m, 2H), 2.44 (s, 3H), 3.83 (s, 3H), 4.06–3.95 (b, 2H), 5.46–5.38 (m, 1H), 5.79 (d, 1H,  $J$  = 1.1 Hz), 6.85–6.78 (m, 1H), 7.33–7.08 (m, 14H), 7.51–7.47 (m, 2H);  $^{13}\text{C}$  NMR  $\delta$  21.6, 27.5, 55.5, 55.7, 114.3, 115.9, 126.9, 127.4, 127.6, 128.0, 128.1, 129.0, 129.2, 129.8, 129.9, 130.1, 131.0, 137.0, 137.7, 138.3, 140.0, 142.8, 143.0, 143.1, 159.0;  $R_f$  = 0.47 (hexane : AcOEt = 3:1). Exact Mass: exact mass,  $m/z$  507.18693 (calcd for  $\text{C}_{32}\text{H}_{29}\text{NO}_3\text{S}$   $m/z$  507.18681). Anal. Calcd for  $\text{C}_{32}\text{H}_{29}\text{NO}_3\text{S}$ : C, 75.71; H, 5.76; N, 2.76. Found: C, 75.62; H, 5.69; N, 2.70.

**7-Methoxy-4-(2,2-diphenylvinyl)quinoline (6a) and 5-methoxy-4-(2,2-diphenylvinyl)-quinoline (7a).** To a solution of a mixture of **4a** and **5a** (60 mg, 0.12 mmol) in MeOH (5 ml) was added potassium hydroxide (95 mg, 1.69 mmol) at room temperature. The mixture was stirred at 64 °C for 30 h, quenched by the addition of water, and extracted with AcOEt. The combined extracts were dried with  $\text{Na}_2\text{SO}_4$  and concentrated by a rotary evaporator to give an oil, which, on CC, gave **6a** (29 mg, 72 %) and **7a** (4 mg, 9 %) both as a yellow gum. **6a**:  $^1\text{H}$  NMR  $\delta$  3.96 (s, 3H), 6.74 (d, 1H,  $J$  = 4.7 Hz), 7.10–7.04 (m, 2H), 7.20–7.15 (m, 4H), 7.45–7.34 (m, 7H), 8.03 (d, 1H,  $J$  = 9.1 Hz), 8.50 (d, 1H,  $J$  = 4.7 Hz);  $^{13}\text{C}$  NMR  $\delta$  55.5, 107.7, 119.4, 119.6, 122.6, 123.3, 125.6, 127.8, 128.17, 128.25, 128.31, 128.35, 130.3, 139.2, 142.5, 143.5, 147.7, 148.9, 150.0, 150.1, 160.4;  $R_f$  = 0.17 (hexane : AcOEt = 3 : 1); Exact Mass: exact mass,  $m/z$  337.14660 (calcd for  $\text{C}_{24}\text{H}_{19}\text{NO}$   $m/z$  337.14666). Anal. Calcd for  $\text{C}_{24}\text{H}_{19}\text{NO}$ : C, 85.43; H, 5.68; N, 4.15. Found: C, 85.29; H, 5.62; N, 4.11.

**7a**:  $^1\text{H}$  NMR  $\delta$  3.90 (s, 3H), 6.78 (dd, 1H,  $J$  = 1.1, 4.7 Hz), 6.78 (dd, 1H,  $J$  = 1.1, 7.7 Hz), 7.20–7.04 (m, 4H), 7.44–7.30 (m, 5H), 7.72–7.59 (m, 3H), 8.47 (d, 1H,  $J$  = 4.7 Hz);  $^{13}\text{C}$  NMR  $\delta$  56.1, 105.6, 120.5, 122.4, 122.9, 127.2, 127.6, 128.06, 128.09, 128.2, 128.9, 129.6, 130.9, 139.6, 141.7, 142.9, 144.2, 149.7, 150.2, 150.1, 157.2;  $R_f$  = 0.27 (hexane : AcOEt = 3 : 1).

**4-(2,2-Diphenylvinyl)quinoline (6g).** To a solution of **4g** (75 mg, 0.16 mmol) in MeOH (5 ml) was added potassium hydroxide (95 mg, 1.69 mmol) at room temperature. The mixture was stirred at 64 °C for 30 h, quenched by the addition of water, and extracted with AcOEt. The combined extracts were dried with  $\text{Na}_2\text{SO}_4$  and concentrated by a rotary evaporator to give an oil, which, on CC, gave **6g** (47 mg, 94 %) as a yellow gum:  $^1\text{H}$  NMR  $\delta$  6.87 (d, 1H,  $J$  = 4.4 Hz), 7.12–7.06 (m, 2H), 7.30–7.14 (m, 3H), 7.47–7.34 (m, 6H), 7.57–7.49 (m, 1H), 7.74–7.67 (m, 1H), 8.18–8.09 (m, 2H), 8.59 (d,  $J$  = 4.7 Hz);  $^{13}\text{C}$  NMR  $\delta$  121.5, 123.1, 124.3, 126.4, 127.6, 127.8, 128.1, 128.26, 128.33, 129.2, 129.9, 130.3, 139.1, 142.4, 143.6, 147.8, 148.3, 149.7;  $R_f$  = 0.33 (hexane : AcOEt = 3 : 1). Exact Mass: exact mass,  $m/z$  307.13601 (calcd for  $\text{C}_{23}\text{H}_{17}\text{N}$   $m/z$  307.13610). Anal. Calcd for  $\text{C}_{23}\text{H}_{17}\text{N}$ : C, 89.87; H, 5.57; N, 4.56. Found: C, 89.77; H, 5.51; N, 4.59.

**Methyl quinoline-4-carboxylate (8g).** To a solution of **6g** (47 mg, 0.15 mmol) in THF (3 ml) was added potassium permanganate (121 mg, 0.76 mmol) dissolved in H<sub>2</sub>O (1 ml) at 0 °C. The mixture was stirred at 0 °C for 5 h, neutralized with aqueous NaHCO<sub>3</sub> at 0 °C, and concentrated by a rotary evaporator to give an oil. To a solution of the oil in MeOH (5 ml) was added chlorotrimethylsilane (0.50 ml 3.93 mmol) at room temperature. The mixture was stirred at 55 °C for 3 days, neutralized with aqueous NaHCO<sub>3</sub> at 0 °C, and extracted with AcOEt. The combined extracts were dried with Na<sub>2</sub>SO<sub>4</sub> and concentrated by a rotary evaporator to give an oil, which, on CC, gave **8g** (17 mg, 60 %) as a colorless oil: <sup>1</sup>H NMR δ 4.04 (s, 3H), 7.70–7.63 (m, 1H), 7.81–7.74 (m, 1H), 7.91 (d, 1H, *J* = 4.4 Hz), 8.20–8.15 (m, 1H), 8.80–8.74 (m, 1H), 9.20 (d, 1H, *J* = 4.4 Hz); <sup>13</sup>C NMR δ 52.7, 122.2, 125.0, 125.6, 128.2, 129.7, 130.0, 134.8, 149.1, 149.8, 166.6; IR (neat) 1728 cm<sup>-1</sup>; *R*<sub>f</sub> = 0.33 (hexane : AcOEt = 3 : 1). Exact Mass: exact mass, *m/z* 187.06333 (calcd for C<sub>11</sub>H<sub>9</sub>NO<sub>2</sub> *m/z* 187.06333). Anal. Calcd for C<sub>11</sub>H<sub>9</sub>NO<sub>2</sub>: C, 70.58; H, 4.85; N, 7.48; O, 17.09. Found: C, 70.50; H, 4.90; N, 7.42.

***N*-Methoxy-*N*-(4-trimethylsiloxy-4,4-diphenyl-2-butynyl)-(*m*-methoxybenzyl)amine (13a).** To a solution of 3-methoxybenzyl bromide (3.00 ml, 21.4 mmol) in DMF (50 ml) was added *N,N*-diisopropylethylamine (8.96 mL, 64.3 mmol) followed by the addition of MeONH<sub>2</sub>·HCl (2.15 g, 25.7 mmol) at room temperature. The mixture was stirred at room temperature for 19 h, quenched by the addition of water, and extracted with AcOEt. The combined extracts were dried with Na<sub>2</sub>SO<sub>4</sub> and concentrated by a rotary evaporator to give an oil, which on, CC, gave *N*-(3-methoxybenzyl)-*O*-methylhydroxylamine (**D**) as a yellow oil (2.06 g, 58 %).

To a solution of **D** (1.65 g, 9.84 mmol) in DMF (20 ml) was added *N,N*-diisopropylethylamine (2.51 ml, 14.8 mmol) followed by the addition of propargyl bromide (0.89 ml, 11.8 mmol) at room temperature. The mixture was stirred at 60 °C for 15 h, quenched by the addition of water, and extracted with AcOEt. The combined extracts were dried with Na<sub>2</sub>SO<sub>4</sub> and concentrated by a rotary evaporator to give an oil, which, on CC, gave *N*-(3-methoxybenzyl)-*N*-(2-propynyl)-*O*-methylhydroxylamine (**E**) as a yellow oil (1.98 g, 98 %).

To a solution of **E** (520 mg, 2.44 mmol) in THF (12 ml) was added BuLi (2.05 ml, 3.17 mmol) dropwise at 0 °C followed by the addition of benzophenone (532 mg, 2.92 mmol) at 0 °C. The mixture was stirred at 0 °C for 30 min, quenched by the addition of water, and extracted with AcOEt. The combined extracts were dried with Na<sub>2</sub>SO<sub>4</sub> and concentrated by a rotary evaporator to give an oil, which, on CC, gave *N*-(3-methoxybenzyl)-*N*-(4-hydroxy-4,4-diphenyl-2-propynyl)-*O*-methylhydroxylamine (**F**) as a yellow oil (709 mg, 75 %).

To a solution of **F** (709 mg, 1.83 mmol) in DMF (12 ml) was added imidazole (747 mg, 10.1 mmol) and chlorotrimethylsilane (0.70 ml, 5.49 mmol) at room temperature. The mixture was stirred at rt for 1 h, quenched by the addition of water, and extracted with AcOEt. The combined extracts were dried with Na<sub>2</sub>SO<sub>4</sub> and concentrated by a rotary evaporator to give an oil, which on, CC, gave **13a** as a yellow oil. (808 mg, 96 %); <sup>1</sup>H NMR δ 0.13 (s, 9H), 3.42 (s, 3H), 3.72 (s, 2H), 3.79 (s, 3H), 3.92 (s, 2H), 6.86–6.80 (m, 1H), 6.95–6.90 (m, 2H), 7.32–7.18 (m, 7H), 7.62–7.58 (m, 4H); <sup>13</sup>C NMR δ 1.5,

46.3, 55.2, 60.7, 61.3, 75.6, 83.7, 87.4, 113.1, 114.8, 121.9, 126.1, 127.1, 127.9, 129.2, 138.6, 146.7, 159.5; IR (neat)  $2349\text{ cm}^{-1}$ ;  $R_f = 0.77$  (hexane : AcOEt = 3 : 1).

The following compounds were synthesized by the similar procedure as that for **13a**.

***N*-Methoxy-*N*-(4-trimethylsiloxy-4,4-diphenyl-2-butynyl)-(*m*-methylbenzyl)amine (13b).**

$^1\text{H}$  NMR  $\delta$  0.18 (s, 9H), 2.39 (s, 3H), 3.46 (s, 3H), 3.75 (s, 2H), 3.98 (s, 2H), 7.39–7.10 (m, 10H), 7.69–7.63 (m, 4H);  $^{13}\text{C}$  NMR  $\delta$  1.5, 21.3, 46.2, 60.6, 61.2, 75.6, 83.8, 87.3, 126.1, 126.6, 127.1, 127.9, 128.1, 130.3, 136.8, 137.8, 146.7; IR (neat)  $2341\text{ cm}^{-1}$ ;  $R_f = 0.80$  (hexane : AcOEt = 3 : 1).

**2,7-Dimethoxy-4-(2,2-diphenylvinylidene)-1,2,3,4-tetrahydroisoquinoline (14a).** To a solution of **13a** (127 mg, 0.28 mmol) in  $\text{CH}_2\text{Cl}_2$  (1.5 ml) was added TMSOTf (0.05 ml, 0.28 mmol) dropwise at  $-30\text{ }^\circ\text{C}$ . The mixture was stirred at  $-25\text{ }^\circ\text{C}$  for 45 min, neutralized with aqueous  $\text{NaHCO}_3$  at  $0\text{ }^\circ\text{C}$ , and extracted with AcOEt. The combined extracts were dried with  $\text{Na}_2\text{SO}_4$  and concentrated by a rotary evaporator to give an oil, which, on CC, gave **14a** as a yellow gum. (91 mg, 89 %);  $^1\text{H}$  NMR  $\delta$  3.65 (s, 3H), 3.80 (s, 3H), 2.39 (s, 3H), 4.40–4.00 (b, 4H), 6.69 (d, 1H,  $J = 2.5\text{ Hz}$ ), 6.78 (dd, 1H,  $J = 2.5, 8.5\text{ Hz}$ ), 7.56–7.26 (m, 11H);  $^{13}\text{C}$  NMR  $\delta$  54.9, 55.3, 57.2, 59.6, 100.7, 111.7, 114.0, 114.5, 121.1, 127.4, 128.4, 133.2, 136.6, 159.3, 204.1;  $R_f = 0.53$  (hexane : AcOEt = 3 : 1). Exact Mass: exact mass,  $m/z$  369.17276 (calcd for  $\text{C}_{25}\text{H}_{23}\text{NO}_2$   $m/z$  369.17288). Anal. Calcd for  $\text{C}_{25}\text{H}_{23}\text{NO}_2$ : C, 81.27; H, 6.27; N, 3.79. Found: C, 81.22; H, 6.30; N, 3.69.

The following compound was synthesized by the similar procedure as that for **14a**.

**2-Methoxy-7-methyl-4-(2,2-diphenylvinylidene)-1,2,3,4-tetrahydroisoquinoline (14b).**  $^1\text{H}$  NMR  $\delta$  2.31 (s, 3H), 3.63 (s, 3H), 4.40–3.98 (b, 4H), 7.05–6.93 (m, 2H), 7.47–7.26 (m, 11H);  $^{13}\text{C}$  NMR  $\delta$  21.2, 55.0, 57.0, 59.5, 101.1, 114.5, 125.8, 125.9, 127.2, 127.4, 127.8, 128.1, 128.4, 131.7, 136.5, 137.6, 204.4;  $R_f = 0.67$  (hexane : AcOEt = 3 : 1).

**7-Methoxy-4-(2,2-diphenylvinyl)isoquinoline (16a).** To a solution of **14a** containing **15a** (230 mg, 0.62 mmol) in EtOH (8 ml) was added *p*-toluenesulfonic acid (107 mg, 1.0 equiv) at room temperature. The mixture was stirred at  $78\text{ }^\circ\text{C}$  for 24 h, neutralized with aqueous  $\text{NaHCO}_3$  at  $0\text{ }^\circ\text{C}$ , and extracted with AcOEt. The combined extracts were dried with  $\text{Na}_2\text{SO}_4$  and concentrated by a rotary evaporator to give an oil, which, on CC, gave **16a** as a brown gum. (190 mg, 91 %);  $^1\text{H}$  NMR  $\delta$  3.95 (s, 3H), 7.22–7.04 (m, 6H), 7.45–7.28 (m, 7H), 8.02–7.95 (m, 2H), 8.94 (s, 1H);  $^{13}\text{C}$  NMR  $\delta$  55.4, 105.0, 122.5, 123.3, 125.4, 127.5, 128.0, 128.1, 128.2, 128.3, 128.7, 129.3, 130.4, 139.5, 142.3, 142.8, 146.5, 149.5, 158.2;  $R_f = 0.20$  (hexane : AcOEt = 3 : 1). Exact Mass: exact mass,  $m/z$  337.14659 (calcd for  $\text{C}_{24}\text{H}_{19}\text{NO}$   $m/z$  337.14666). Anal. Calcd for  $\text{C}_{24}\text{H}_{19}\text{NO}$ : C, 85.43; H, 5.68; N, 4.15. Found: C, 85.29; H, 5.64; N, 4.14.

The following compound was synthesized by the similar procedure as that for **16a**.

**7-Methyl-4-(2,2-diphenylvinyl)isoquinoline (16b) and 5-methyl-4-(2,2-diphenylvinyl)-isoquinoline (17b) (5:1).**  $^1\text{H}$  NMR  $\delta$  2.55 (s, 3H), 7.20–7.04 (m, 5H), 7.55–7.28 (m, 7H), 7.72 (s, 1H), 8.05–7.97 (m, 2H), 8.95 (s, 1H);  $^{13}\text{C}$  NMR  $\delta$  21.6, 122.5, 123.5, 126.8, 127.5, 128.0, 128.1, 128.2, 128.3, 128.40, 128.44, 128.6, 129.9, 130.4, 132.6, 133.1, 137.0, 139.6, 142.9, 143.2, 146.4, 150.3;  $R_f = 0.43$  (hexane : AcOEt = 3 : 1).



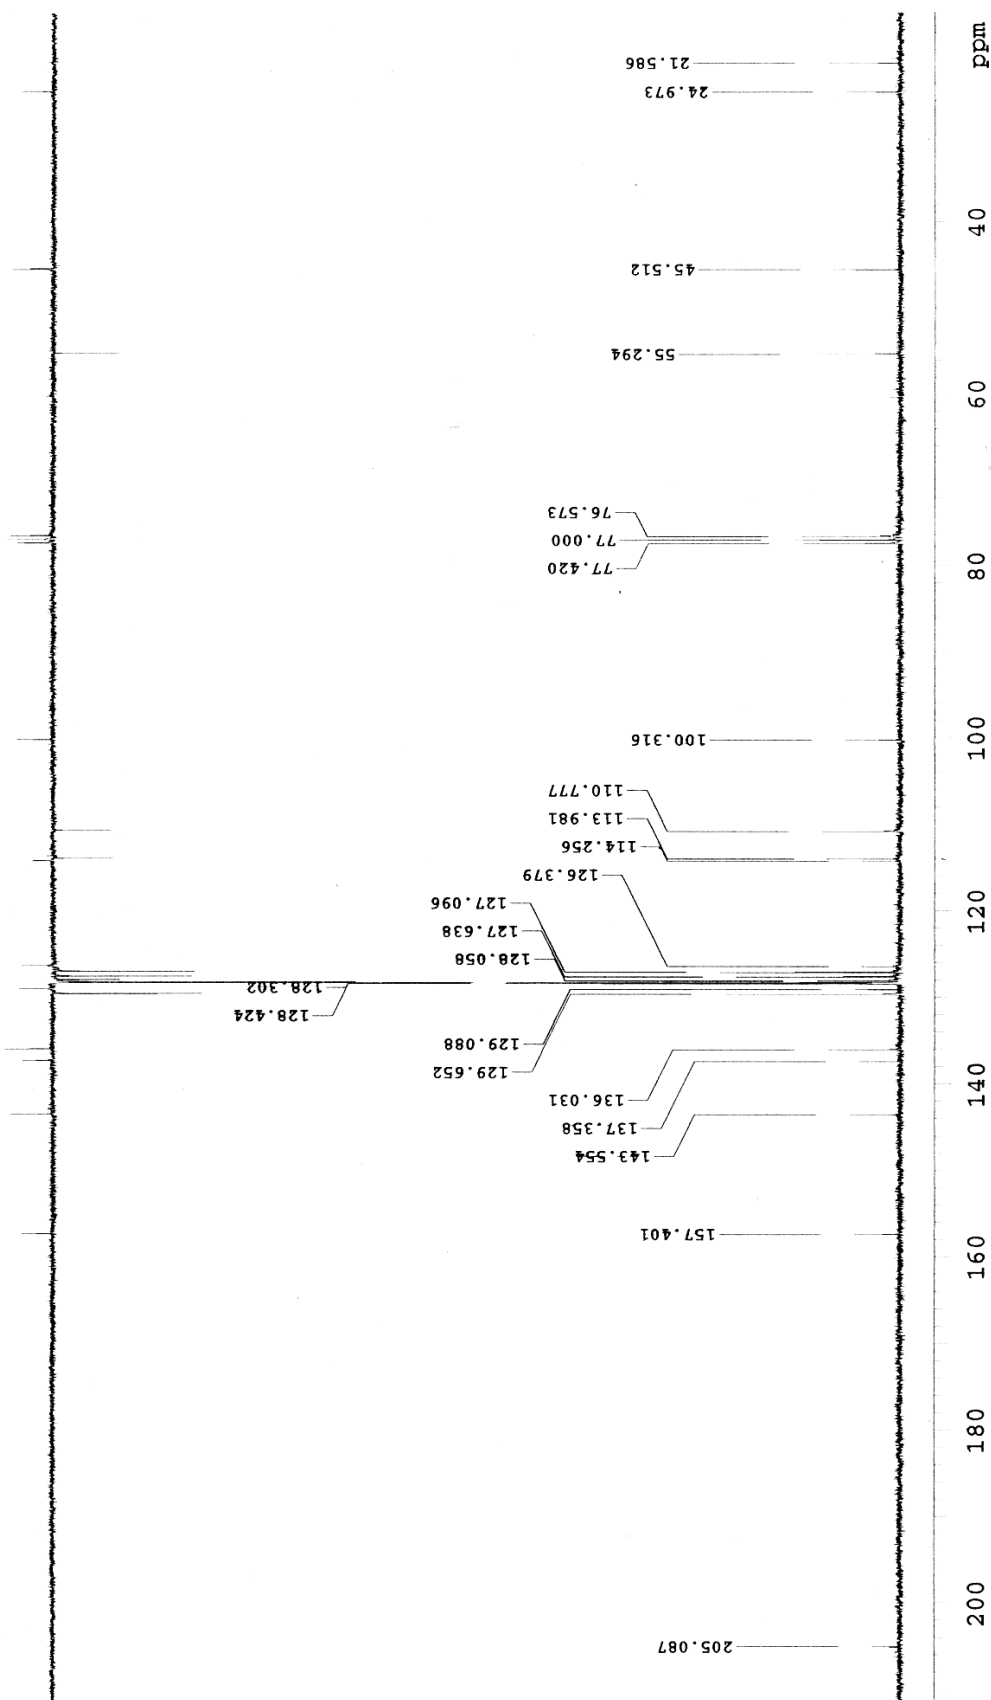

|                                                                                                                                                         |                                                                                                                                    |                                                                                                       |
|---------------------------------------------------------------------------------------------------------------------------------------------------------|------------------------------------------------------------------------------------------------------------------------------------|-------------------------------------------------------------------------------------------------------|
| <p>PULSE SEQUENCE</p> <p>Relax. delay 0.501 sec</p> <p>Pulse 45.0 degrees</p> <p>Acq. time 1.499 sec</p> <p>Width 18865.6 Hz</p> <p>128 repetitions</p> | <p>OBSERVE C13, 75.4560992</p> <p>DECOUPLE H1, 300.0851346</p> <p>Power 36 dB</p> <p>continuously on</p> <p>WALTZ-16 modulated</p> | <p>DATA PROCESSING</p> <p>Line broadening 1.0 Hz</p> <p>FT size 63536</p> <p>Total time 4 minutes</p> |
| <p>SM-II-161A 2b</p> <p>Pulse Sequence: s2pul</p> <p>Solvent: CDCl3</p> <p>Ambient temperature</p> <p>Mercury-300 "varian"</p>                          | <p>Chemical structure of 2b:</p> <chem>COc1ccc2c(c1)nc(c2)C(=C3C=CC=C3)C4=CC=CC=C4</chem>                                          | <p>Chemical structure of 2b:</p> <chem>COc1ccc2c(c1)nc(c2)C(=C3C=CC=C3)C4=CC=CC=C4</chem>             |

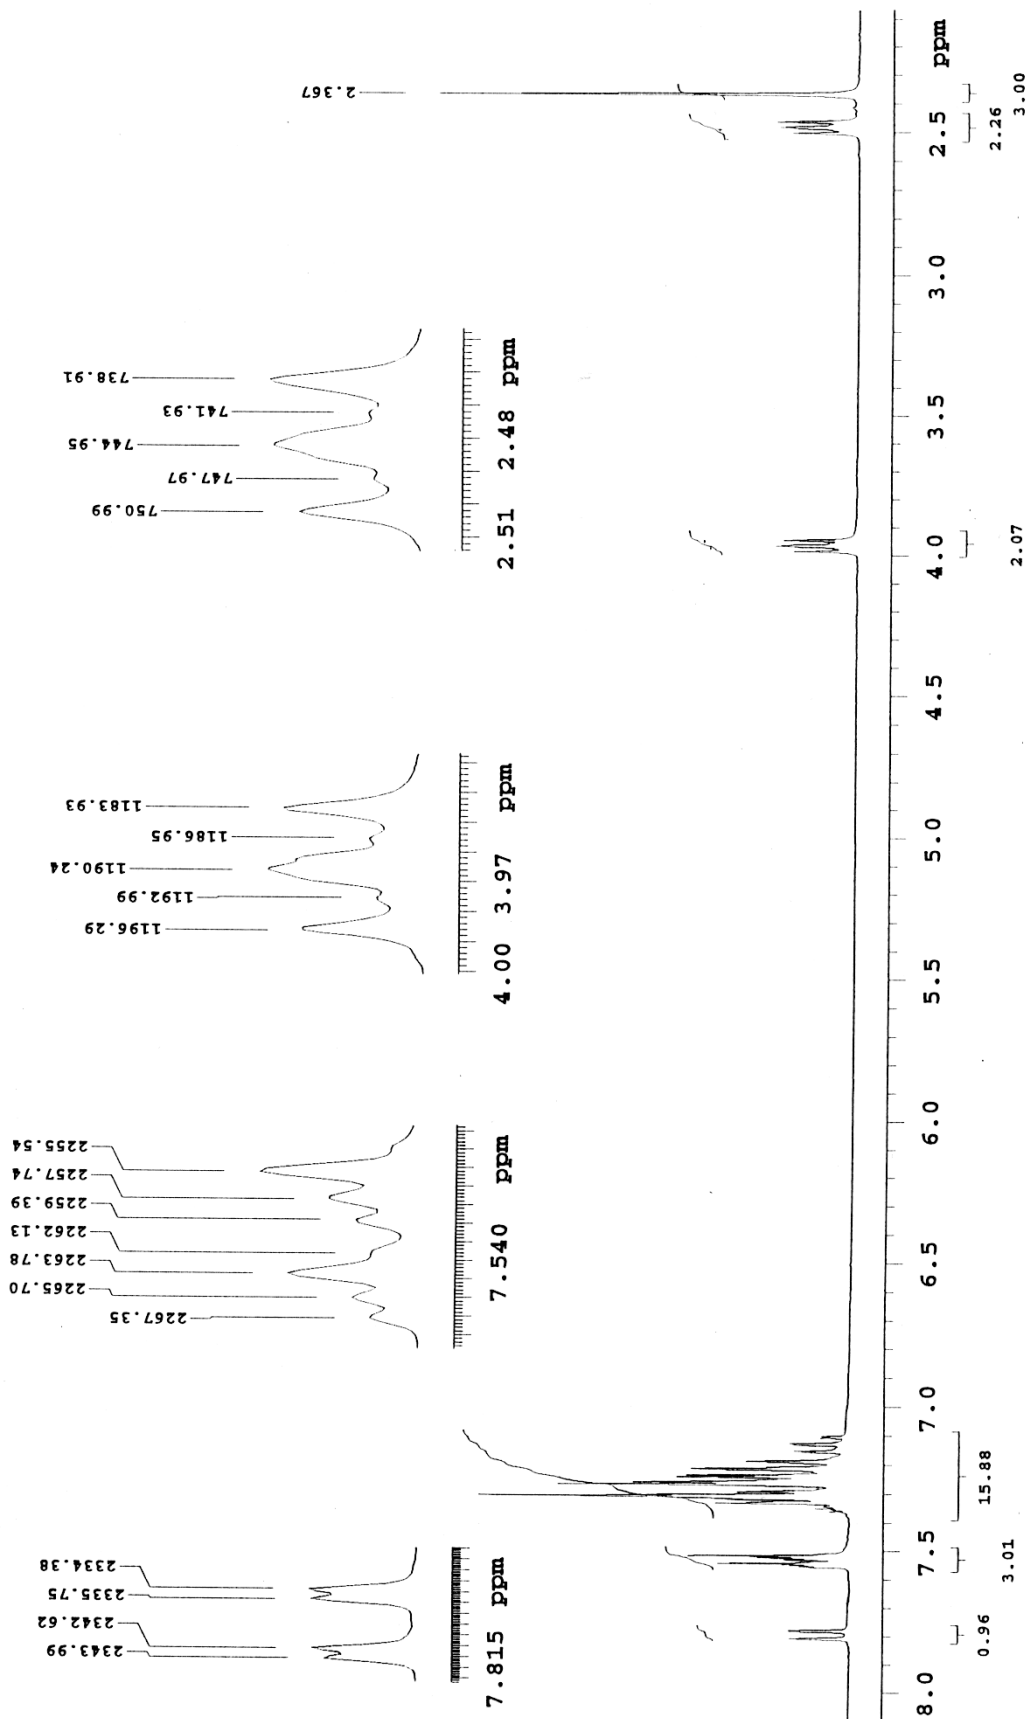

|                                                                                                                                   |                                |                                                                 |                                                                                                                                                              |
|-----------------------------------------------------------------------------------------------------------------------------------|--------------------------------|-----------------------------------------------------------------|--------------------------------------------------------------------------------------------------------------------------------------------------------------|
| <b>PULSE SEQUENCE</b><br>Relax. delay 1.502 sec<br>Pulse 45.0 degrees<br>Acq. time 3.498 sec<br>Width 4500.5 Hz<br>40 repetitions | <b>OBSERVE</b> H1, 300.0836536 | <b>DATA PROCESSING</b><br>F1 size 32768<br>Total time 3 minutes | <div data-bbox="1203 680 1378 815"> <chem>c1ccc(cc1)/C(=C/c2ccccc2)N3CCCCC3</chem> </div> <div data-bbox="1203 479 1378 568">           2f 2g         </div> |
|                                                                                                                                   |                                |                                                                 | Pulse Sequence: s2pul<br>Solvent: CDCl3<br>Ambient temperature<br>Mercury-300 "varian"                                                                       |

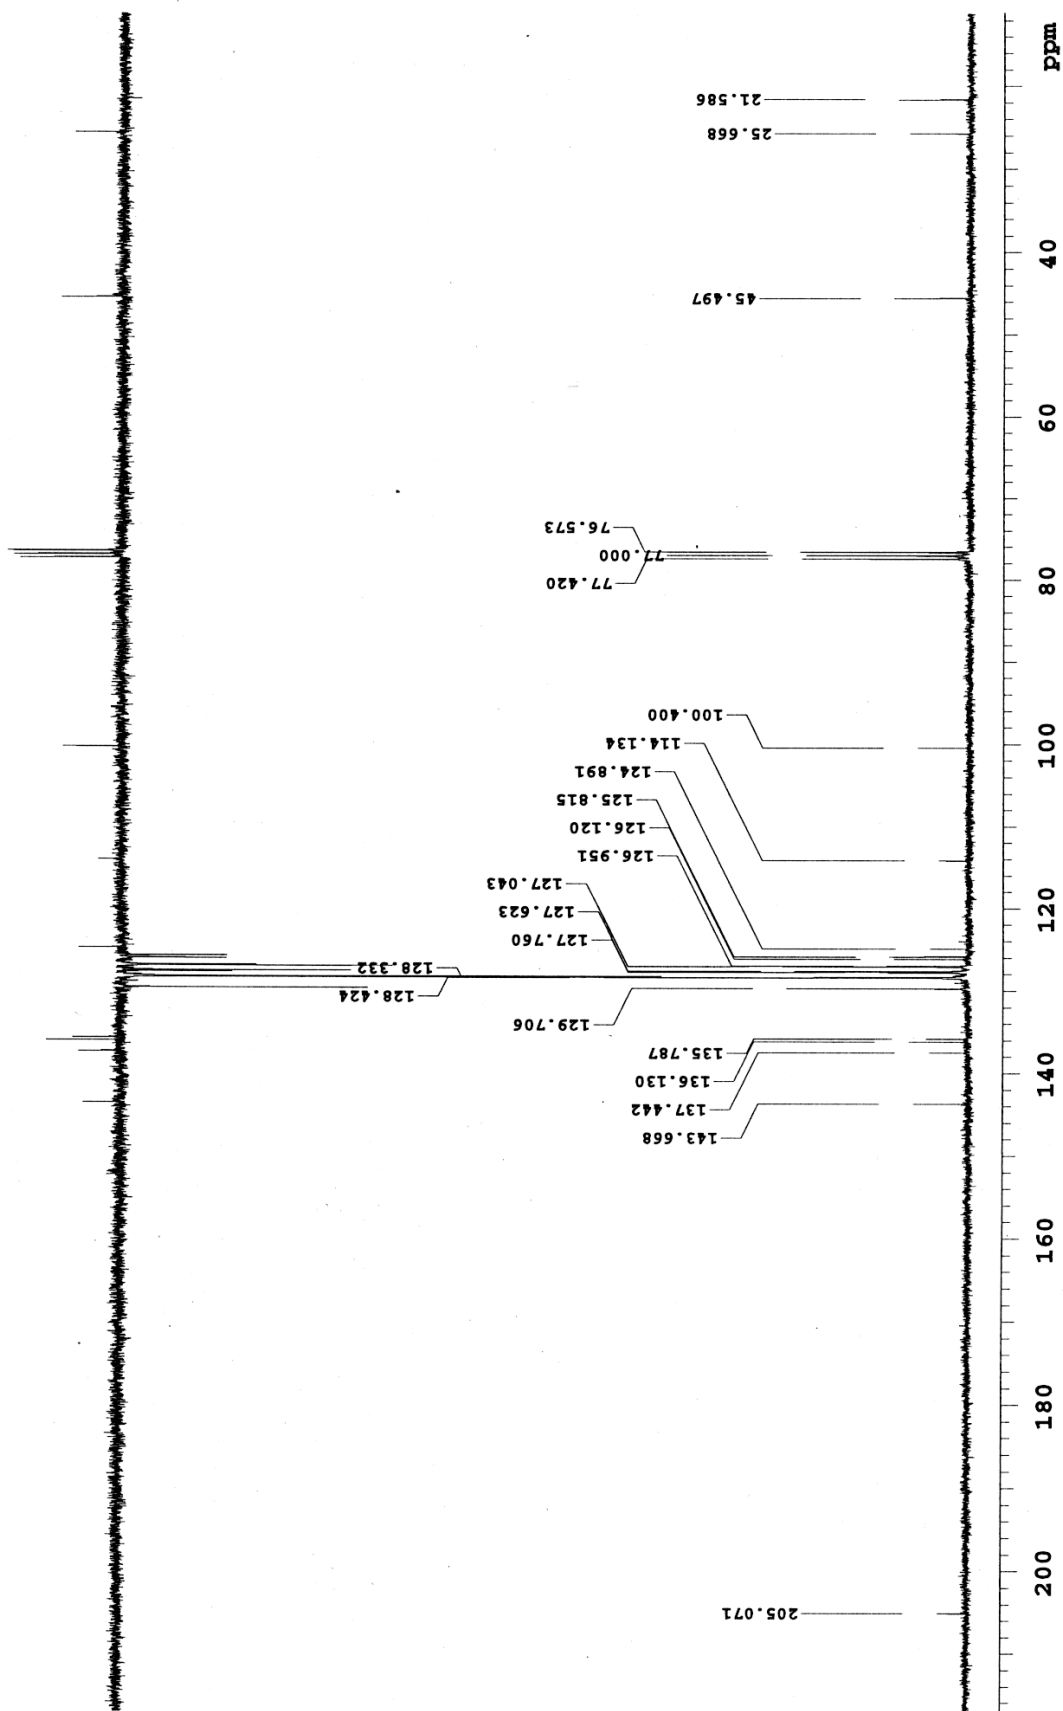

|                                                                                                                                                                                              |                                                                                                                                                            |                                                                                                                                 |                                                                                                                                                                                                                                                                           |
|----------------------------------------------------------------------------------------------------------------------------------------------------------------------------------------------|------------------------------------------------------------------------------------------------------------------------------------------------------------|---------------------------------------------------------------------------------------------------------------------------------|---------------------------------------------------------------------------------------------------------------------------------------------------------------------------------------------------------------------------------------------------------------------------|
| <p><b>PULSE SEQUENCE</b><br/>         Relax. delay 0.501 sec<br/>         Pulse 45.0 degrees<br/>         Acq. time 1.499 sec<br/>         Width 18865.6 Hz<br/>         784 repetitions</p> | <p>OBSERVE C13, 75.4560981<br/>         DECOUPLE H1, 300.0851346<br/>         Power 36 dB<br/>         continuously on<br/>         WALTZ-16 modulated</p> | <p><b>DATA PROCESSING</b><br/>         Line broadening 1.0 Hz<br/>         FT size 65536<br/>         Total time 26 minutes</p> | <div data-bbox="1230 667 1409 772"> </div> <div data-bbox="1230 470 1409 548"> <p>2f 2g</p> </div> <div data-bbox="1230 309 1409 548"> <p>Pulse Sequence: s2pul<br/>         Solvent: CDCl3<br/>         Ambient temperature<br/>         Mercury-300 "varian"</p> </div> |
|----------------------------------------------------------------------------------------------------------------------------------------------------------------------------------------------|------------------------------------------------------------------------------------------------------------------------------------------------------------|---------------------------------------------------------------------------------------------------------------------------------|---------------------------------------------------------------------------------------------------------------------------------------------------------------------------------------------------------------------------------------------------------------------------|

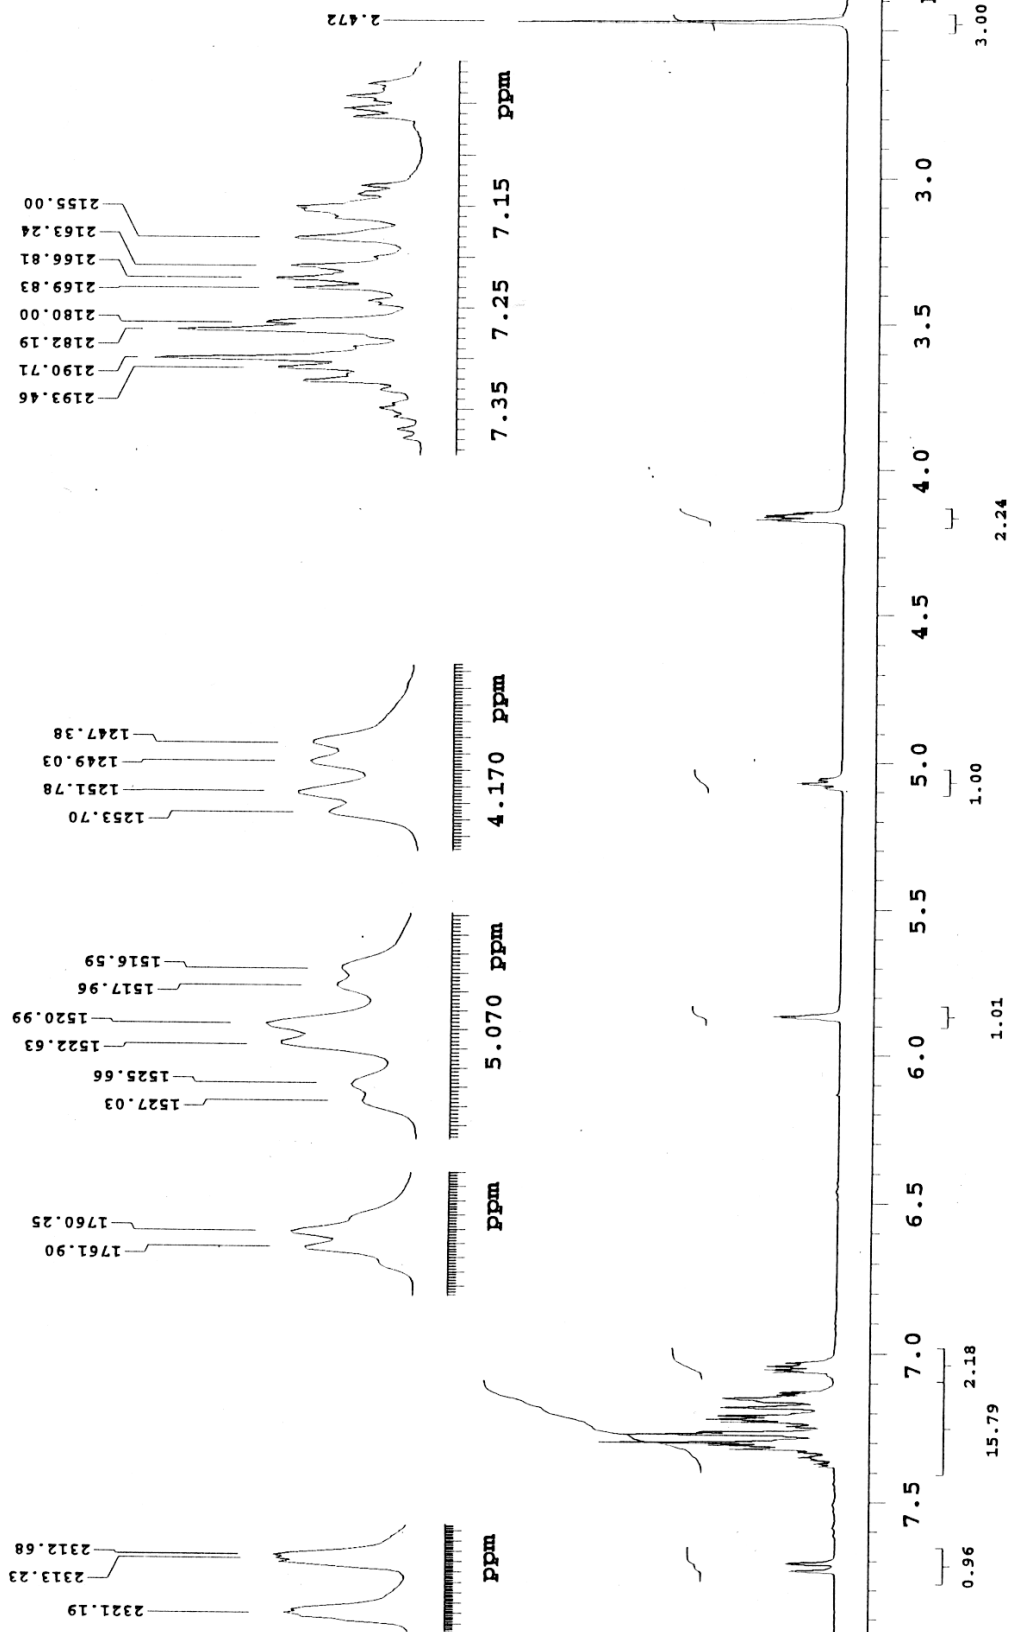

|                                                                                                                                                    |                                       |                                                                            |                                                                                                                                                  |
|----------------------------------------------------------------------------------------------------------------------------------------------------|---------------------------------------|----------------------------------------------------------------------------|--------------------------------------------------------------------------------------------------------------------------------------------------|
| <p><b>PULSE SEQUENCE</b><br/> Relax. delay 1.502 sec<br/> Pulse 45.0 degrees<br/> Acq. time 3.498 sec<br/> Width 4500.5 Hz<br/> 20 repetitions</p> | <p><b>OBSERVE</b> H1, 300.0836520</p> | <p><b>DATA PROCESSING</b><br/> Ft size 32768<br/> Total time 1 minutes</p> | <p><b>SM-III-180A</b> <i>off</i> <i>4g</i><br/> Pulse Sequence: s2pul<br/> Solvent: CDCl3<br/> Ambient temperature<br/> Mercury-300 "varian"</p> |
|----------------------------------------------------------------------------------------------------------------------------------------------------|---------------------------------------|----------------------------------------------------------------------------|--------------------------------------------------------------------------------------------------------------------------------------------------|

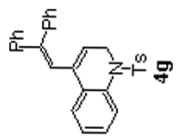

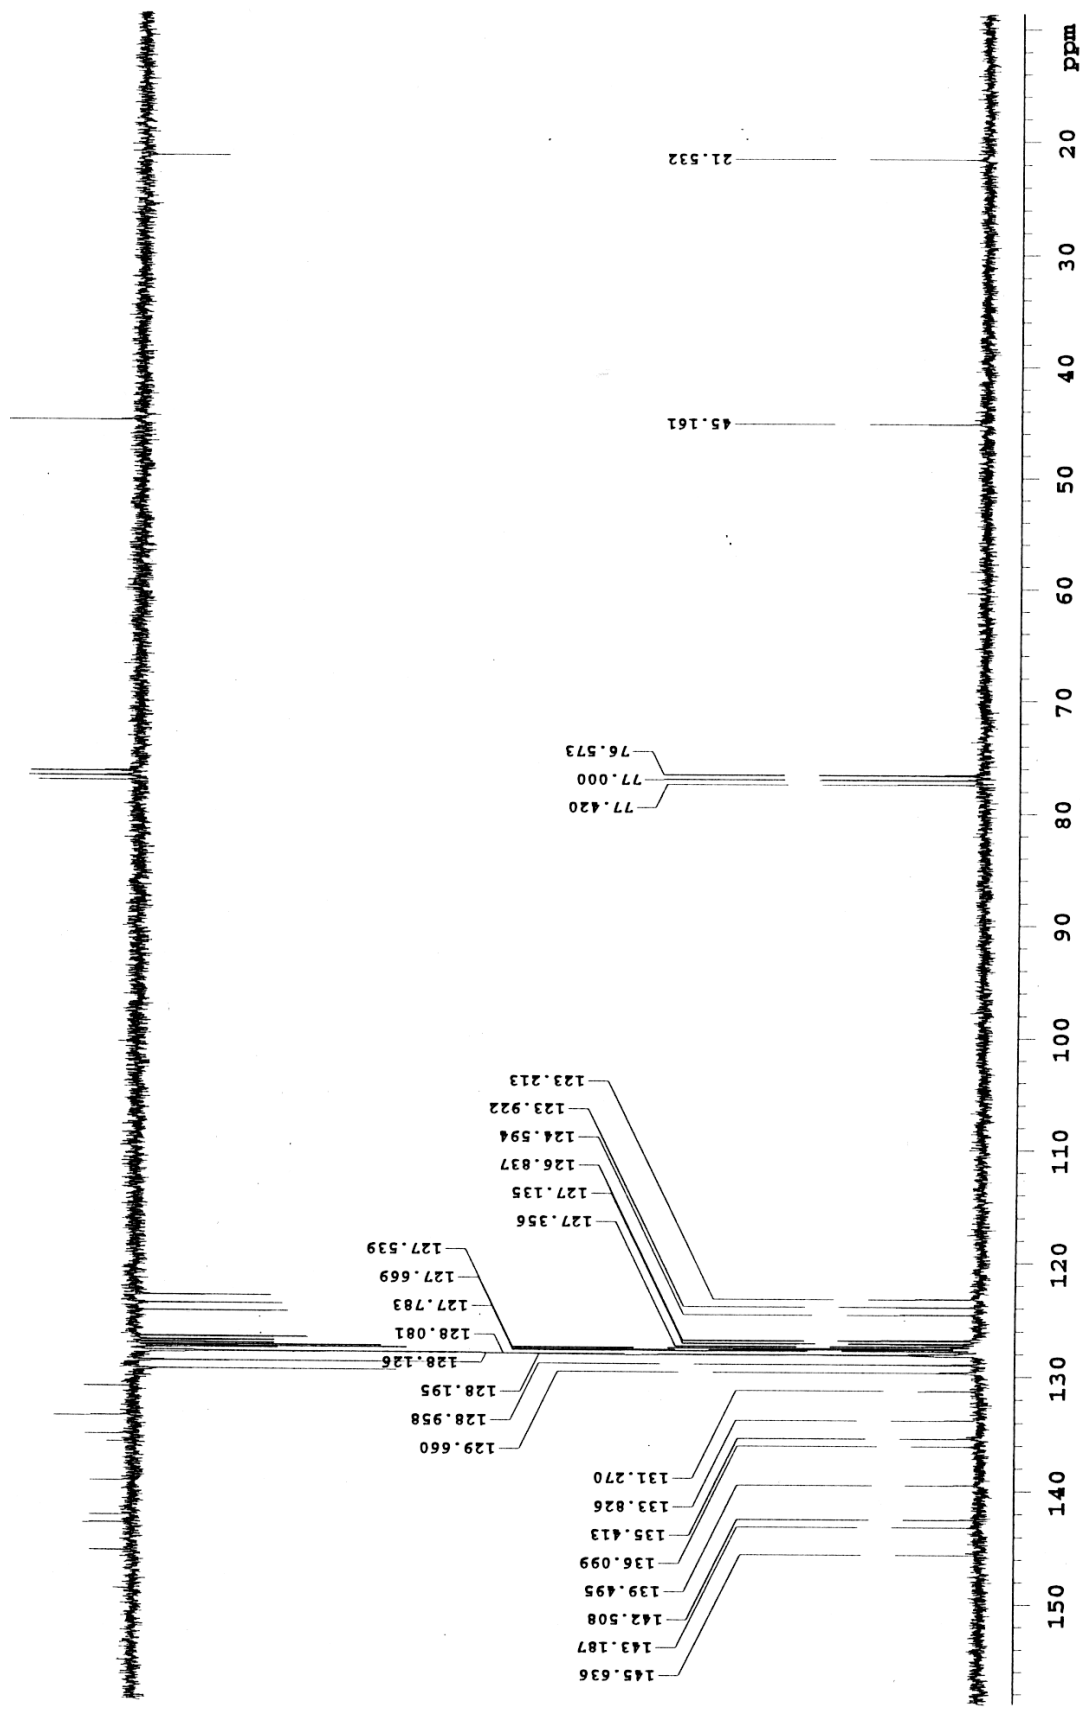

|                                                                                                                                                      |                                                                                                                            |                                                                                                 |                                                                                                                                |
|------------------------------------------------------------------------------------------------------------------------------------------------------|----------------------------------------------------------------------------------------------------------------------------|-------------------------------------------------------------------------------------------------|--------------------------------------------------------------------------------------------------------------------------------|
| <p><b>PULSE SEQUENCE</b><br/> Relax. delay 0.501 sec<br/> Pulse 45.0 degrees<br/> Acq. time 1.499 sec<br/> Width 18865.6 Hz<br/> 192 repetitions</p> | <p>OBSERVE C13, 75.4561004<br/> DECOUPLE H1, 300.0851346<br/> Power 36 dB<br/> continuously on<br/> WALTZ-16 modulated</p> | <p>DATA PROCESSING<br/> Line broadening 1.0 Hz<br/> FT size 65536<br/> Total time 6 minutes</p> | <p>SM-III-180A <i>4f</i><br/> Pulse Sequence: s2pul<br/> Solvent: CDCl3<br/> Ambient temperature<br/> Mercury-300 "varian"</p> |
| <p>150 140 130 120 110 100 90 80 70 60 50 40 30 20 ppm</p>                                                                                           | <p>4g</p>                                                                                                                  | <p>Ph</p>                                                                                       | <p>4g</p>                                                                                                                      |

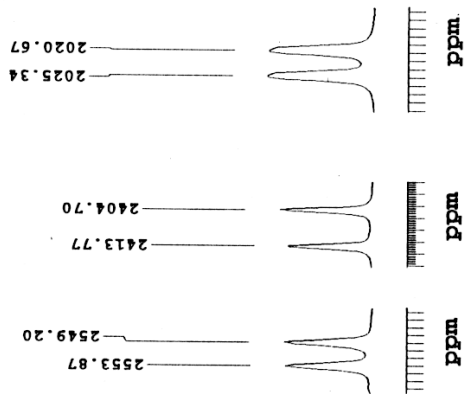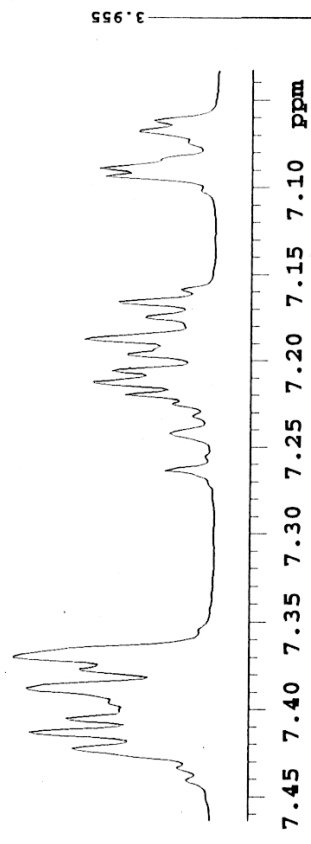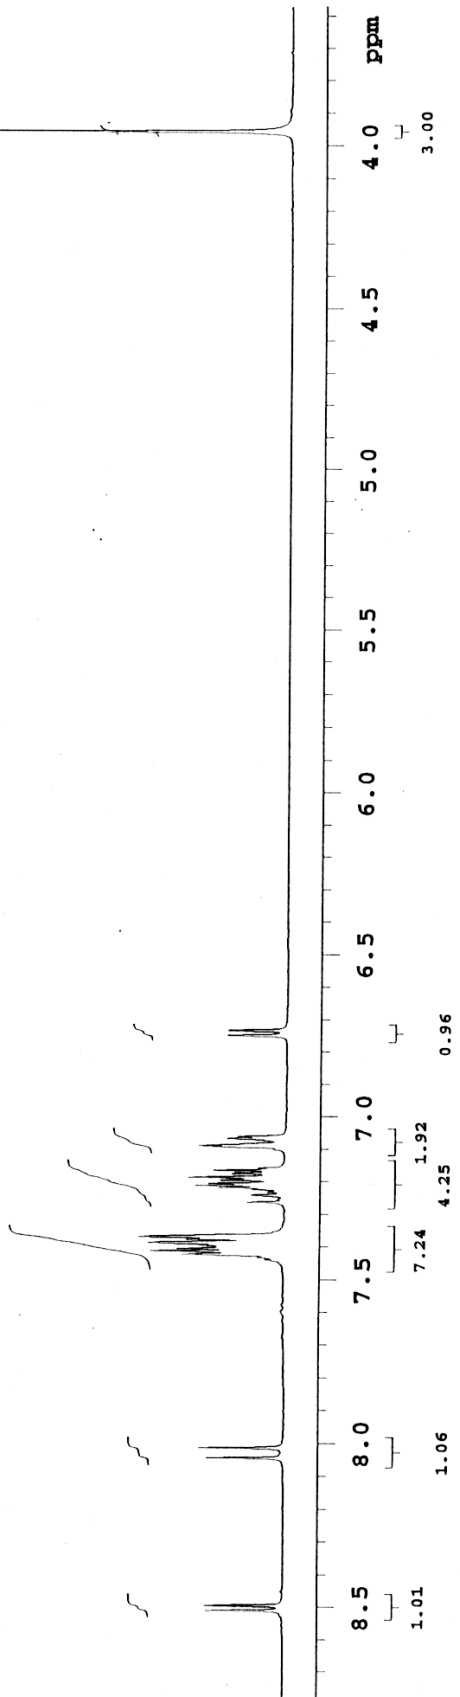

|                                                                                                                                                    |                                |                                                                     |                                                                                                                           |
|----------------------------------------------------------------------------------------------------------------------------------------------------|--------------------------------|---------------------------------------------------------------------|---------------------------------------------------------------------------------------------------------------------------|
| <p><b>PULSE SEQUENCE</b><br/> Relax. delay 1.502 sec<br/> Pulse 45.0 degrees<br/> Acq. time 3.498 sec<br/> Width 4500.5 Hz<br/> 28 repetitions</p> | <p>OBSERVE H1, 300.0836514</p> | <p>DATA PROCESSING<br/> Ft size 32768<br/> Total time 2 minutes</p> | <p>SM-III-182B 5A-1<br/> Pulse Sequence: s2pul<br/> Solvent: CDCl3<br/> Ambient temperature<br/> Mercury-300 "varian"</p> |
| <p>6a</p> <chem>COc1ccc2c(c1)cnc2C=Cc3ccccc3</chem>                                                                                                |                                |                                                                     |                                                                                                                           |

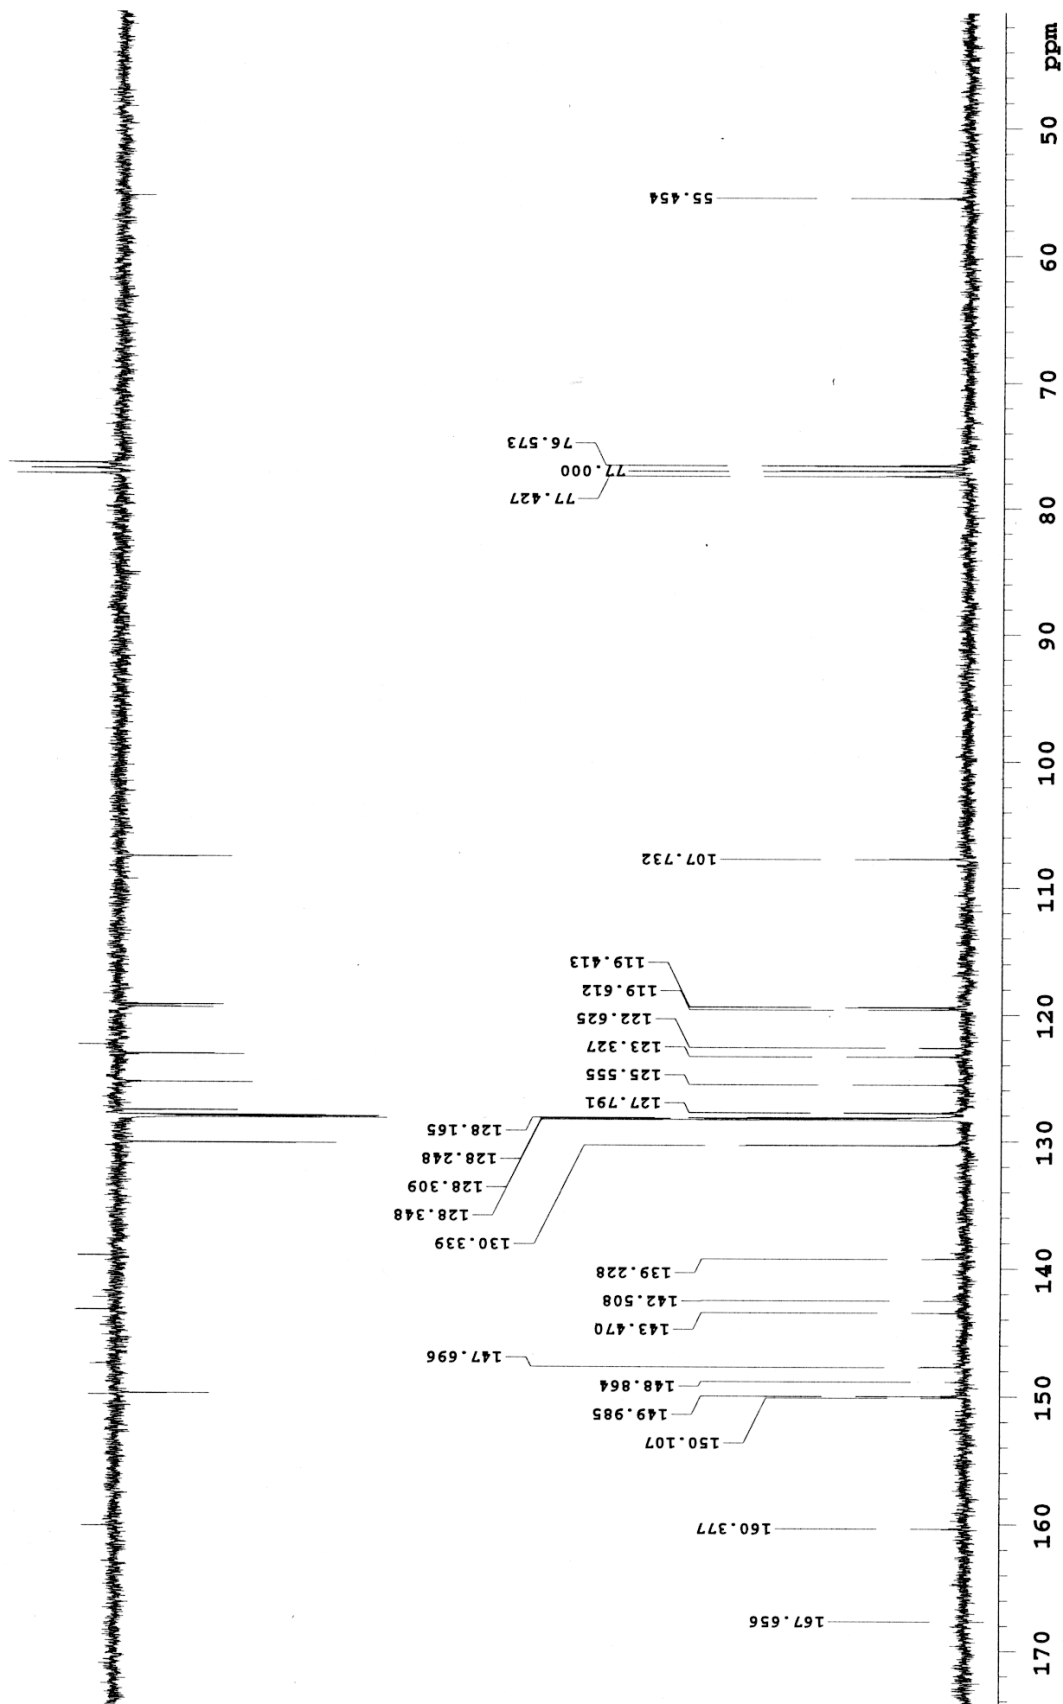

|                                                                                                                                                                                              |                                                                                                                                                            |                                                                                                                                 |                                                                                                                                                           |
|----------------------------------------------------------------------------------------------------------------------------------------------------------------------------------------------|------------------------------------------------------------------------------------------------------------------------------------------------------------|---------------------------------------------------------------------------------------------------------------------------------|-----------------------------------------------------------------------------------------------------------------------------------------------------------|
| <p><b>PULSE SEQUENCE</b><br/>         Relax. delay 0.501 sec<br/>         Pulse 45.0 degrees<br/>         Acq. time 1.499 sec<br/>         Width 18865.6 Hz<br/>         416 repetitions</p> | <p>OBSERVE C13, 75.4560969<br/>         DECOUPLE H1, 300.0851346<br/>         Power 36 dB<br/>         continuously on<br/>         WALTZ-16 modulated</p> | <p><b>DATA PROCESSING</b><br/>         Line broadening 1.0 Hz<br/>         FT size 65536<br/>         Total time 13 minutes</p> | <p>SM-III-182B 5a-1<br/>         Pulse Sequence: s2pul<br/>         Solvent: CDCl3<br/>         Ambient temperature<br/>         Mercury-300 "varian"</p> |
|----------------------------------------------------------------------------------------------------------------------------------------------------------------------------------------------|------------------------------------------------------------------------------------------------------------------------------------------------------------|---------------------------------------------------------------------------------------------------------------------------------|-----------------------------------------------------------------------------------------------------------------------------------------------------------|

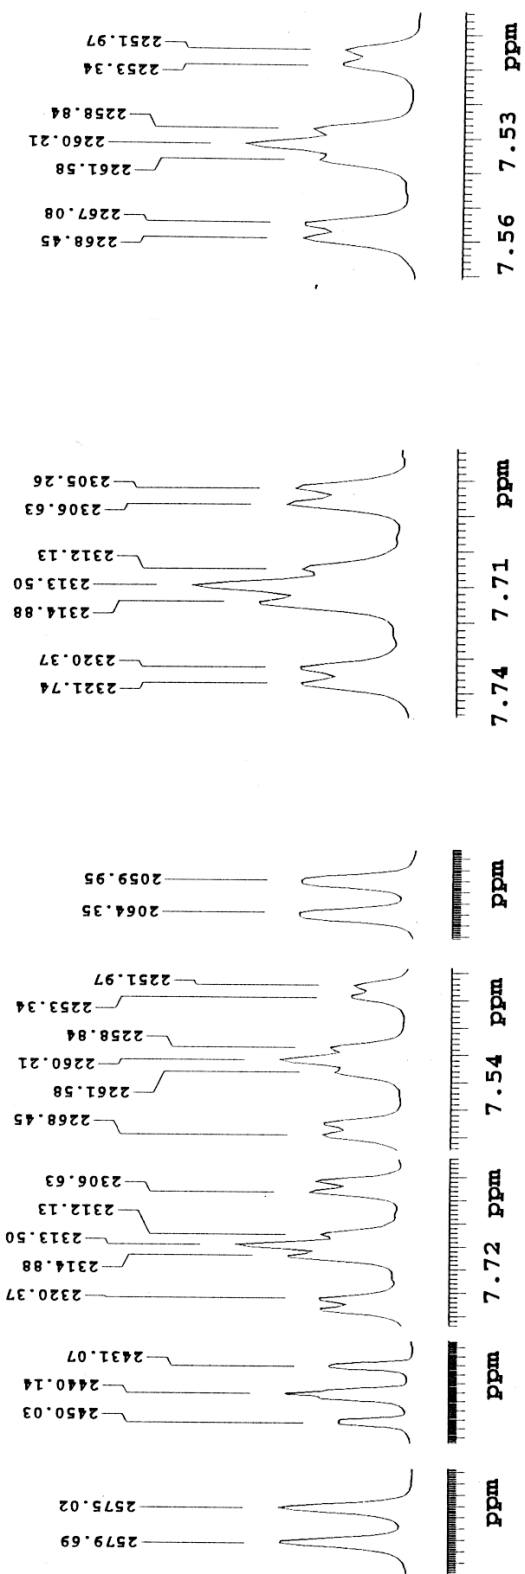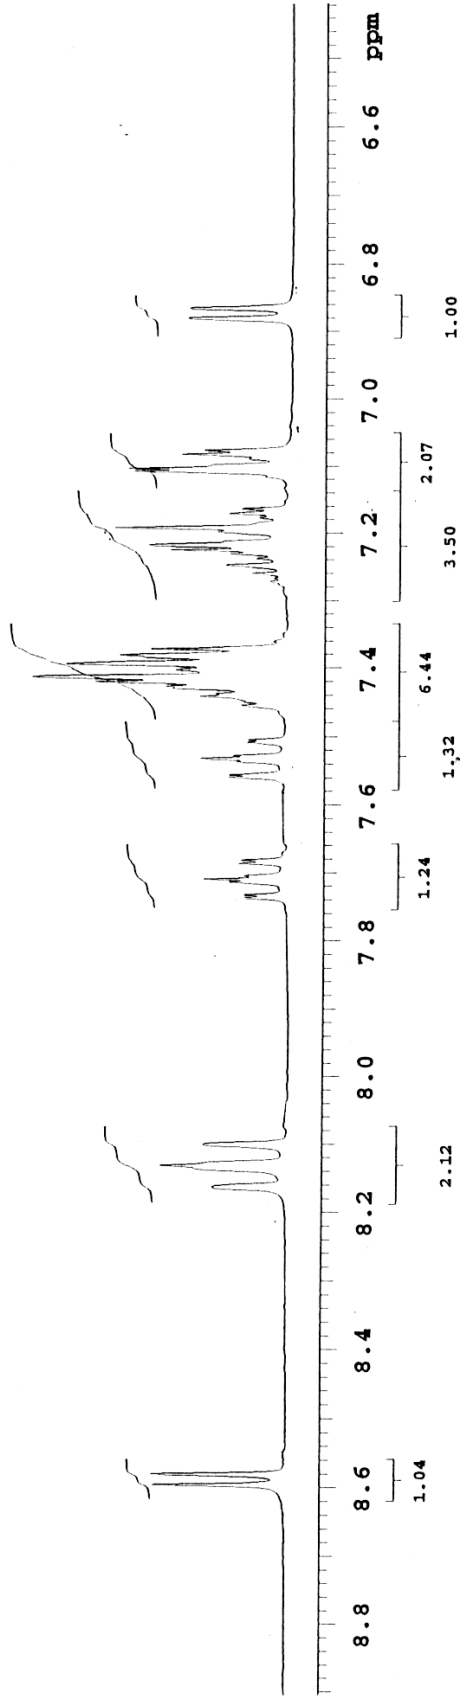

|                                                                                                                                   |                                                                                                       |                                                                                                  |                                                                                                         |
|-----------------------------------------------------------------------------------------------------------------------------------|-------------------------------------------------------------------------------------------------------|--------------------------------------------------------------------------------------------------|---------------------------------------------------------------------------------------------------------|
| <b>PULSE SEQUENCE</b><br>Relax. delay 1.502 sec<br>Pulse 45.0 degrees<br>Acq. time 3.498 sec<br>Width 4500.5 Hz<br>20 repetitions | <b>OBSERVE</b> H1, 300.0836534<br><br><b>DATA PROCESSING</b><br>FT size 32768<br>Total time 1 minutes | 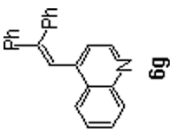<br><b>6g</b> | <b>SM-III</b><br>Pulse Sequence: s2pul<br>Solvent: CDCl3<br>Ambient temperature<br>Mercury-300 "varian" |
|-----------------------------------------------------------------------------------------------------------------------------------|-------------------------------------------------------------------------------------------------------|--------------------------------------------------------------------------------------------------|---------------------------------------------------------------------------------------------------------|

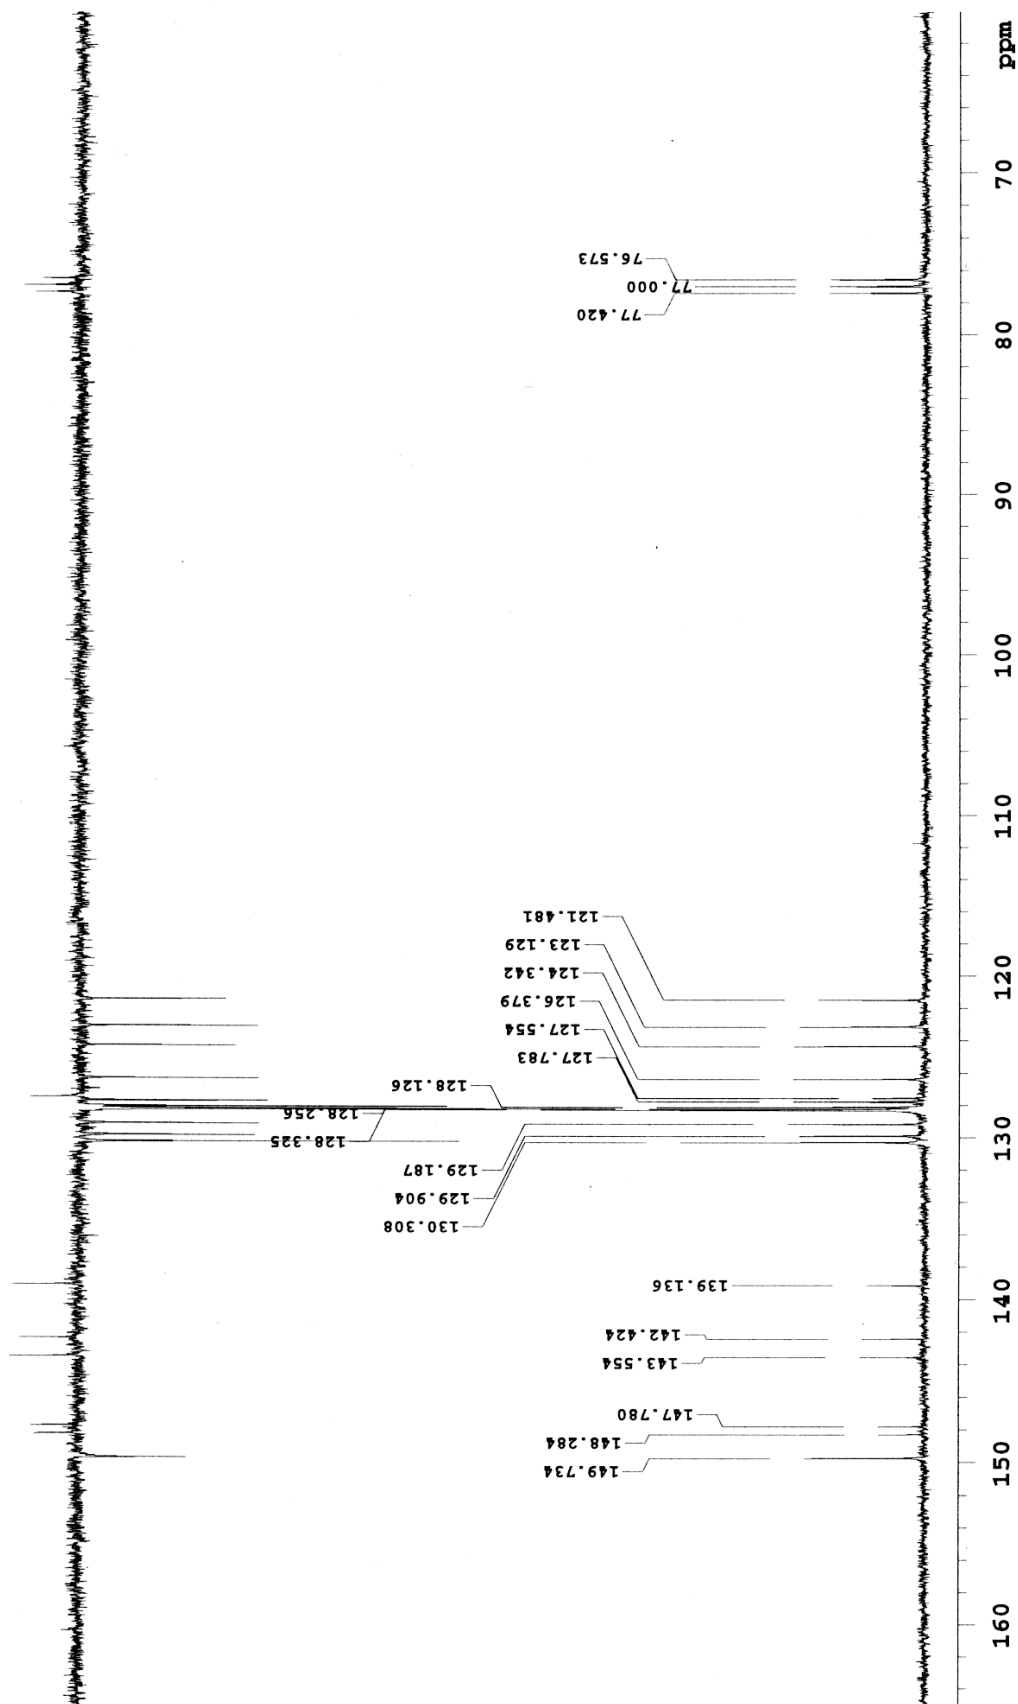

|                                                                                                                                                                                                        |                                                                                                                                                                    |                                                                                                                                      |                                                                                                                                                                                     |
|--------------------------------------------------------------------------------------------------------------------------------------------------------------------------------------------------------|--------------------------------------------------------------------------------------------------------------------------------------------------------------------|--------------------------------------------------------------------------------------------------------------------------------------|-------------------------------------------------------------------------------------------------------------------------------------------------------------------------------------|
| <p><b>PULSE SEQUENCE</b><br/>           Relax. delay 0.501 sec<br/>           Pulse 45.0 degrees<br/>           Acq. time 1.499 sec<br/>           Width 18865.6 Hz<br/>           192 repetitions</p> | <p>OBSERVE C13, 75.4561021<br/>           DECOUPLE H1, 300.0851346<br/>           Power 36 dB<br/>           continuously on<br/>           WALTZ-16 modulated</p> | <p><b>DATA PROCESSING</b><br/>           Line broadening 1.0 Hz<br/>           FT size 65536<br/>           Total time 6 minutes</p> | <p>SM-III-<del>684</del> <i>5F 6g</i><br/>           Pulse Sequence: s2pul<br/>           Solvent: CDCl3<br/>           Ambient temperature<br/>           Mercury-300 "varian"</p> |
| <p>Ph<br/> <br/>           6g</p>                                                                                   |                                                                                                                                                                    |                                                                                                                                      |                                                                                                                                                                                     |

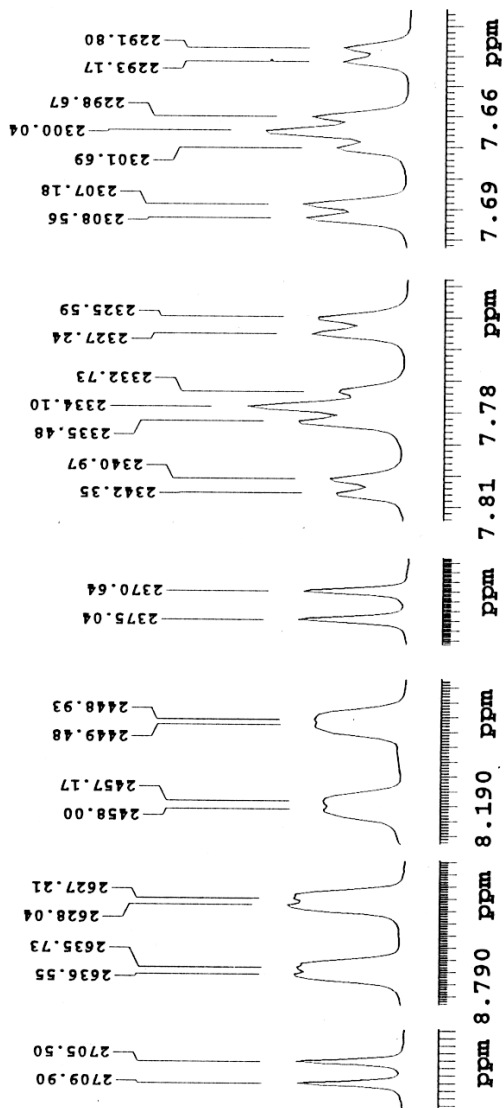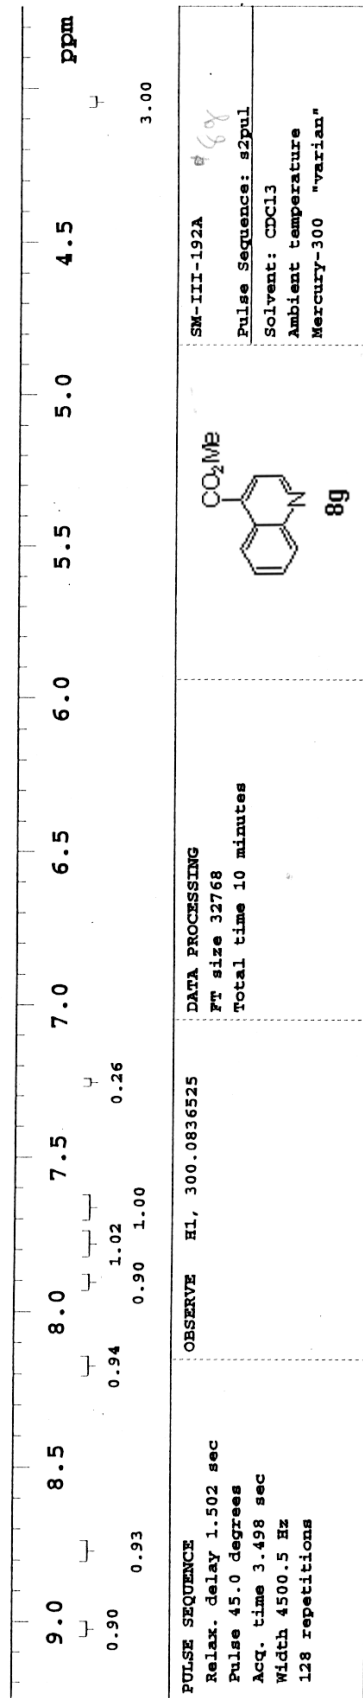

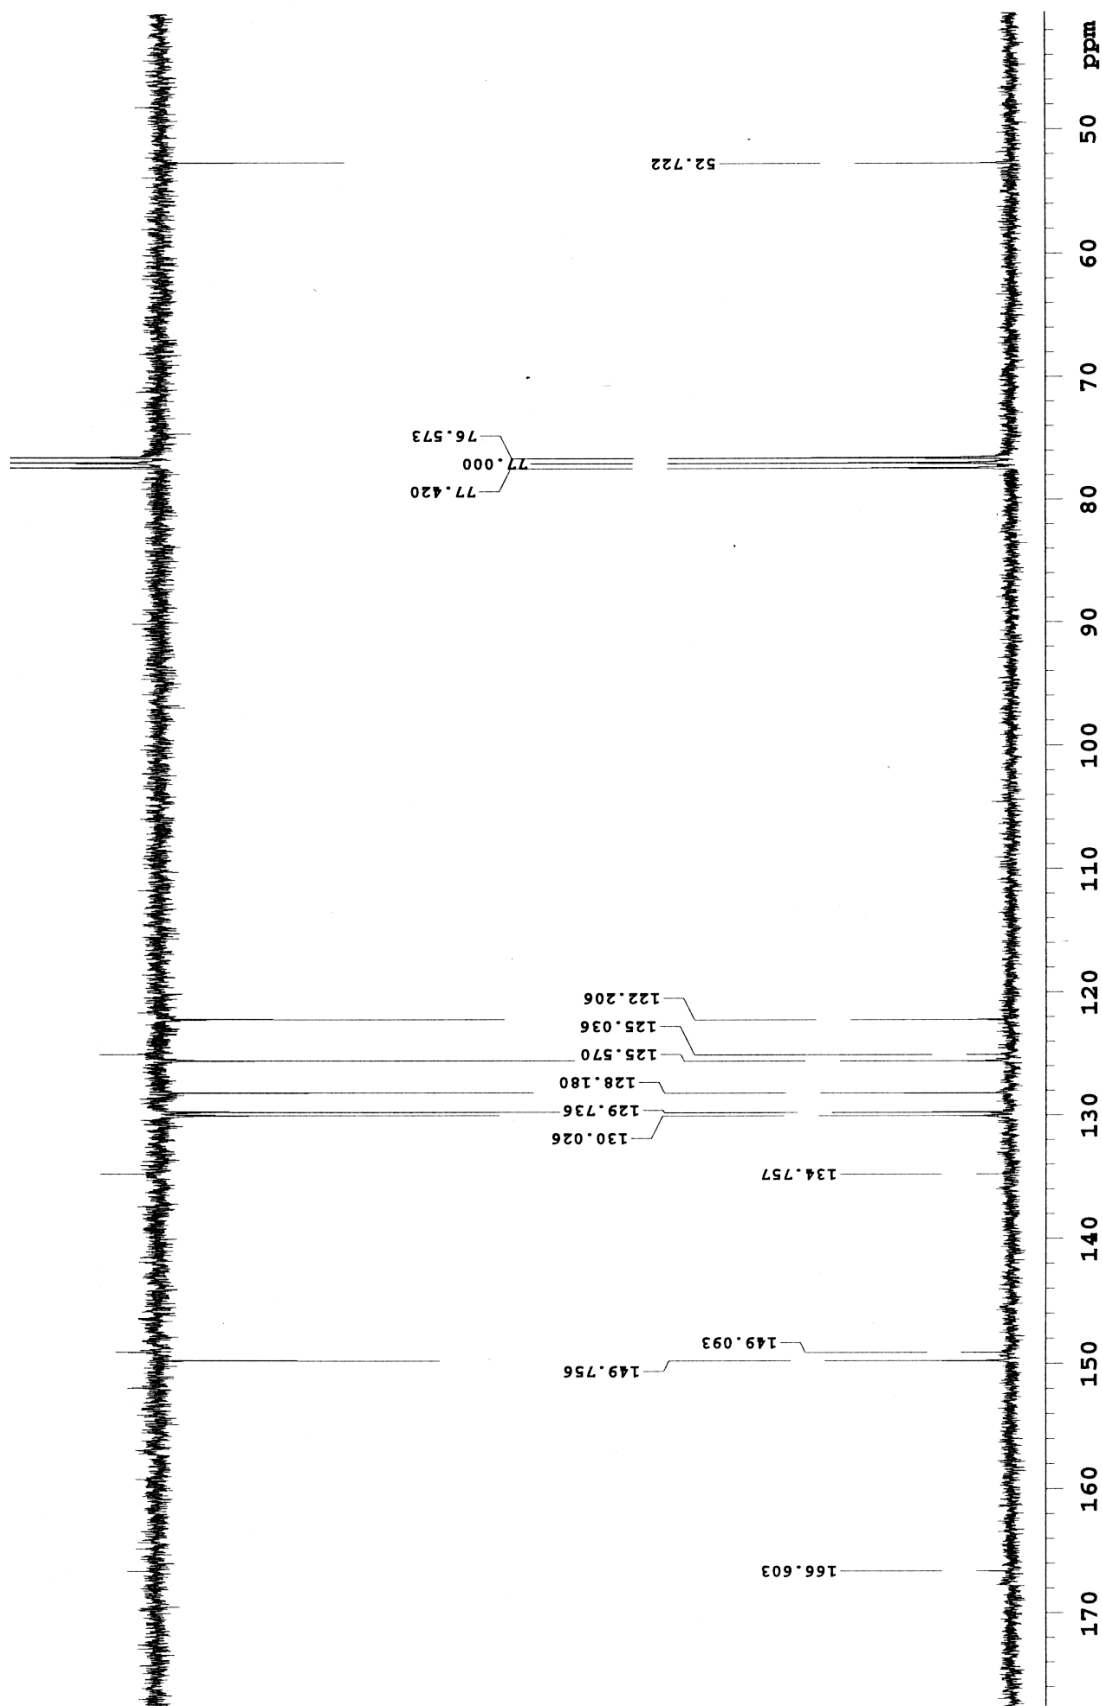

|                                                                                                                                      |                                                                                                                           |                                                                                            |                                                                                                              |
|--------------------------------------------------------------------------------------------------------------------------------------|---------------------------------------------------------------------------------------------------------------------------|--------------------------------------------------------------------------------------------|--------------------------------------------------------------------------------------------------------------|
| <b>PULSE SEQUENCE</b><br>Relax. delay 0.501 sec<br>Pulse 45.0 degrees<br>Acq. time 1.499 sec<br>Width 18865.6 Hz<br>1136 repetitions | <b>OBSERVE</b> C13, 75.4560958<br><b>DECOUPLE</b> H1, 300.0851346<br>Power 36 dB<br>continuously on<br>WALTZ-16 modulated | <b>DATA PROCESSING</b><br>Line broadening 1.0 Hz<br>FT size 65536<br>Total time 37 minutes | <b>SM-III-192B</b><br>Pulse Sequence: s2pul<br>Solvent: CDCl3<br>Ambient temperature<br>Mercury-300 "varian" |
| <chem>CN(C)C(=O)c1cccc2c1c[nH]2</chem><br><b>8g</b>                                                                                  |                                                                                                                           |                                                                                            |                                                                                                              |

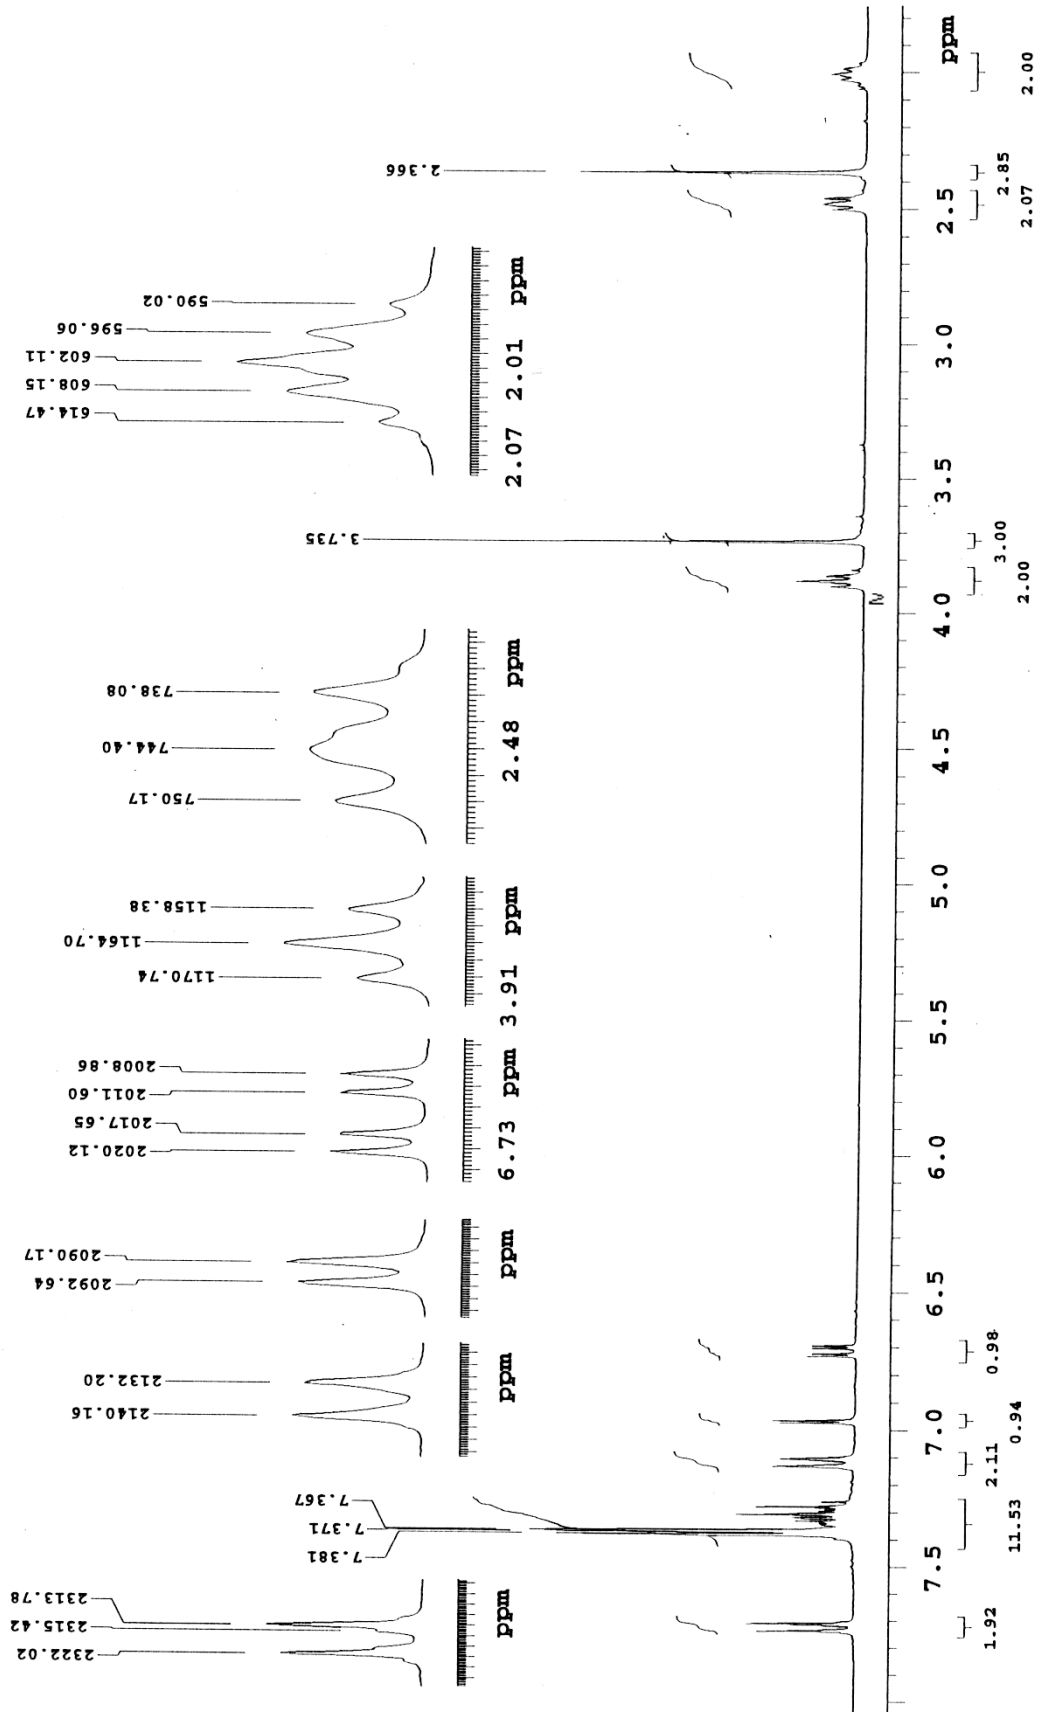

|                                                                                                                                   |                                                                                                       |                                                                                                  |
|-----------------------------------------------------------------------------------------------------------------------------------|-------------------------------------------------------------------------------------------------------|--------------------------------------------------------------------------------------------------|
| <b>PULSE SEQUENCE</b><br>Relax. delay 1.502 sec<br>Pulse 45.0 degrees<br>Acq. time 3.498 sec<br>Width 4500.5 Hz<br>32 repetitions | <b>OBSERVE</b> H1, 300.0836523<br><br><b>DATA PROCESSING</b><br>F1 size 32768<br>Total time 2 minutes | 8 (11)<br>Pulse Sequence: s2pul<br>Solvent: CDCl3<br>Ambient temperature<br>Mercury-300 "varian" |
|-----------------------------------------------------------------------------------------------------------------------------------|-------------------------------------------------------------------------------------------------------|--------------------------------------------------------------------------------------------------|

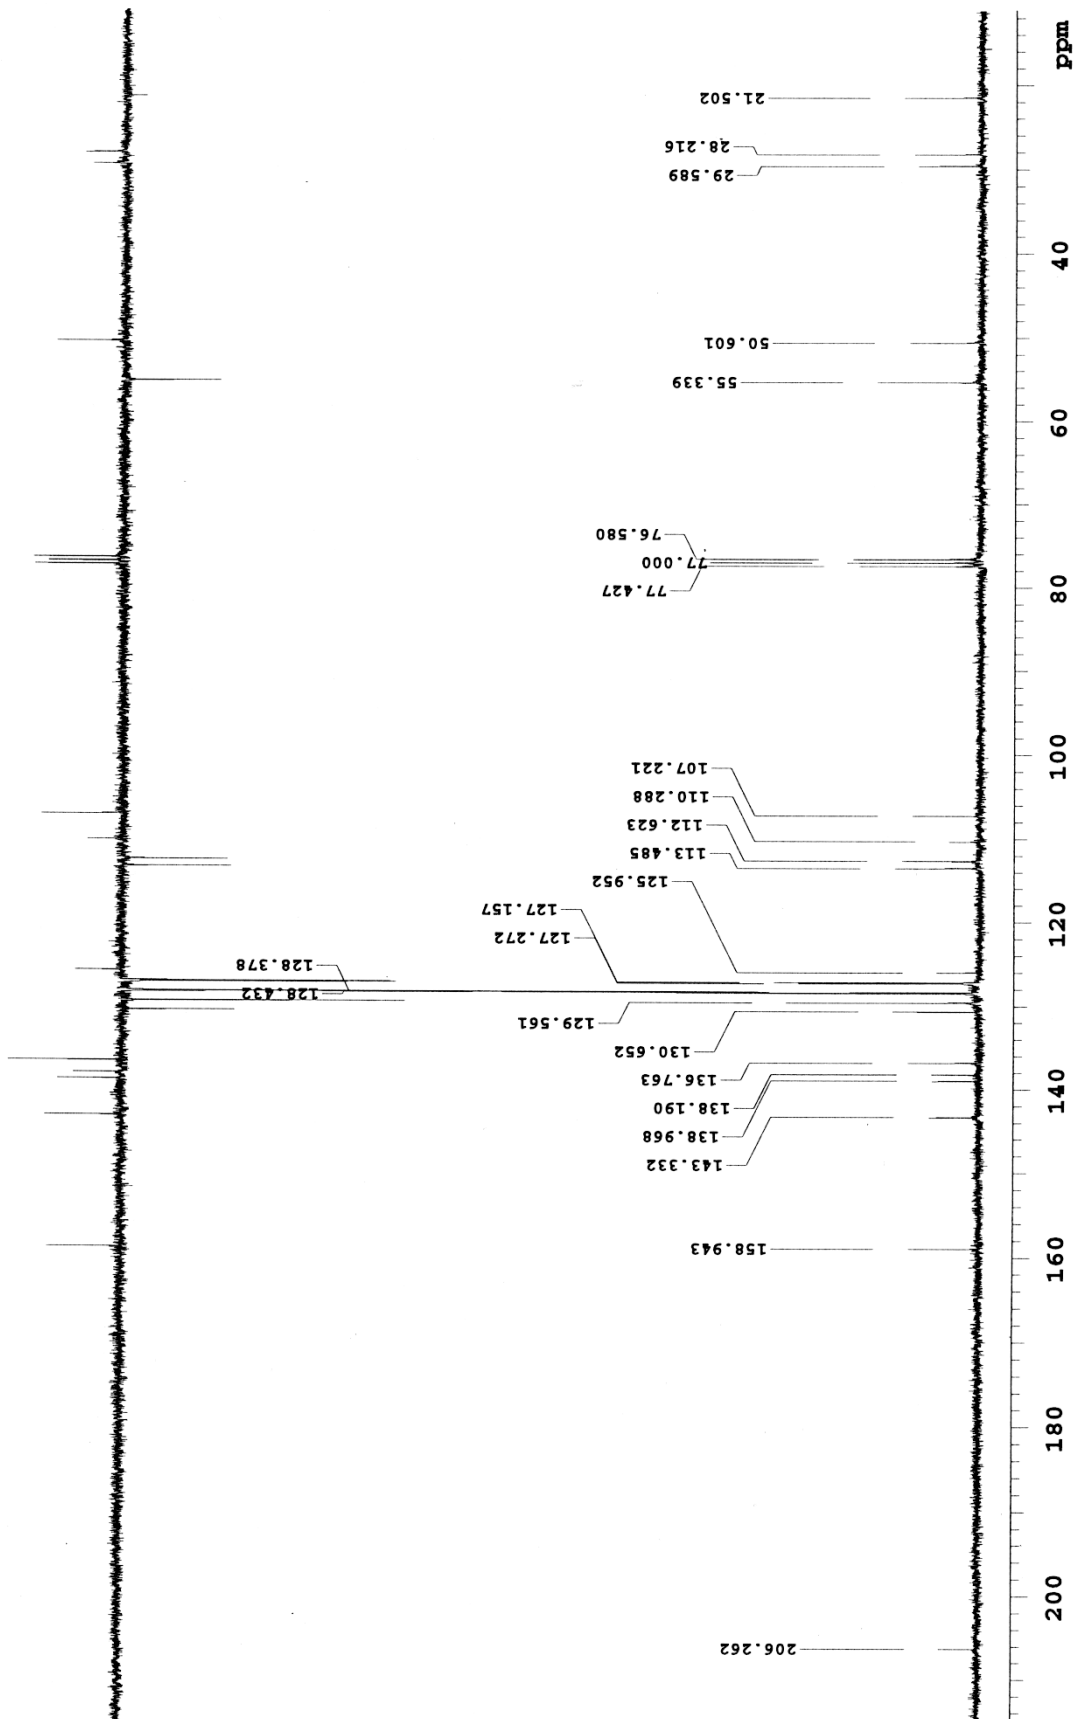

|                                                                                                                                                      |                                                                                                                            |                                                                                                         |                                                       |                                                                                                                 |
|------------------------------------------------------------------------------------------------------------------------------------------------------|----------------------------------------------------------------------------------------------------------------------------|---------------------------------------------------------------------------------------------------------|-------------------------------------------------------|-----------------------------------------------------------------------------------------------------------------|
| <p><b>PULSE SEQUENCE</b><br/> Relax. delay 0.501 sec<br/> Pulse 45.0 degrees<br/> Acq. time 1.499 sec<br/> Width 18865.6 Hz<br/> 336 repetitions</p> | <p>OBSERVE C13, 75.4560992<br/> DECOUPLE H1, 300.0851346<br/> Power 36 dB<br/> continuously on<br/> WALTZ-16 modulated</p> | <p><b>DATA PROCESSING</b><br/> Line broadening 1.0 Hz<br/> FT size 65536<br/> Total time 11 minutes</p> | <div data-bbox="1276 627 1436 806"> <p>11a</p> </div> | <p>8 (11)<br/> Pulse Sequence: s2pul<br/> Solvent: CDCl3<br/> Ambient temperature<br/> Mercury-300 "varian"</p> |
|------------------------------------------------------------------------------------------------------------------------------------------------------|----------------------------------------------------------------------------------------------------------------------------|---------------------------------------------------------------------------------------------------------|-------------------------------------------------------|-----------------------------------------------------------------------------------------------------------------|

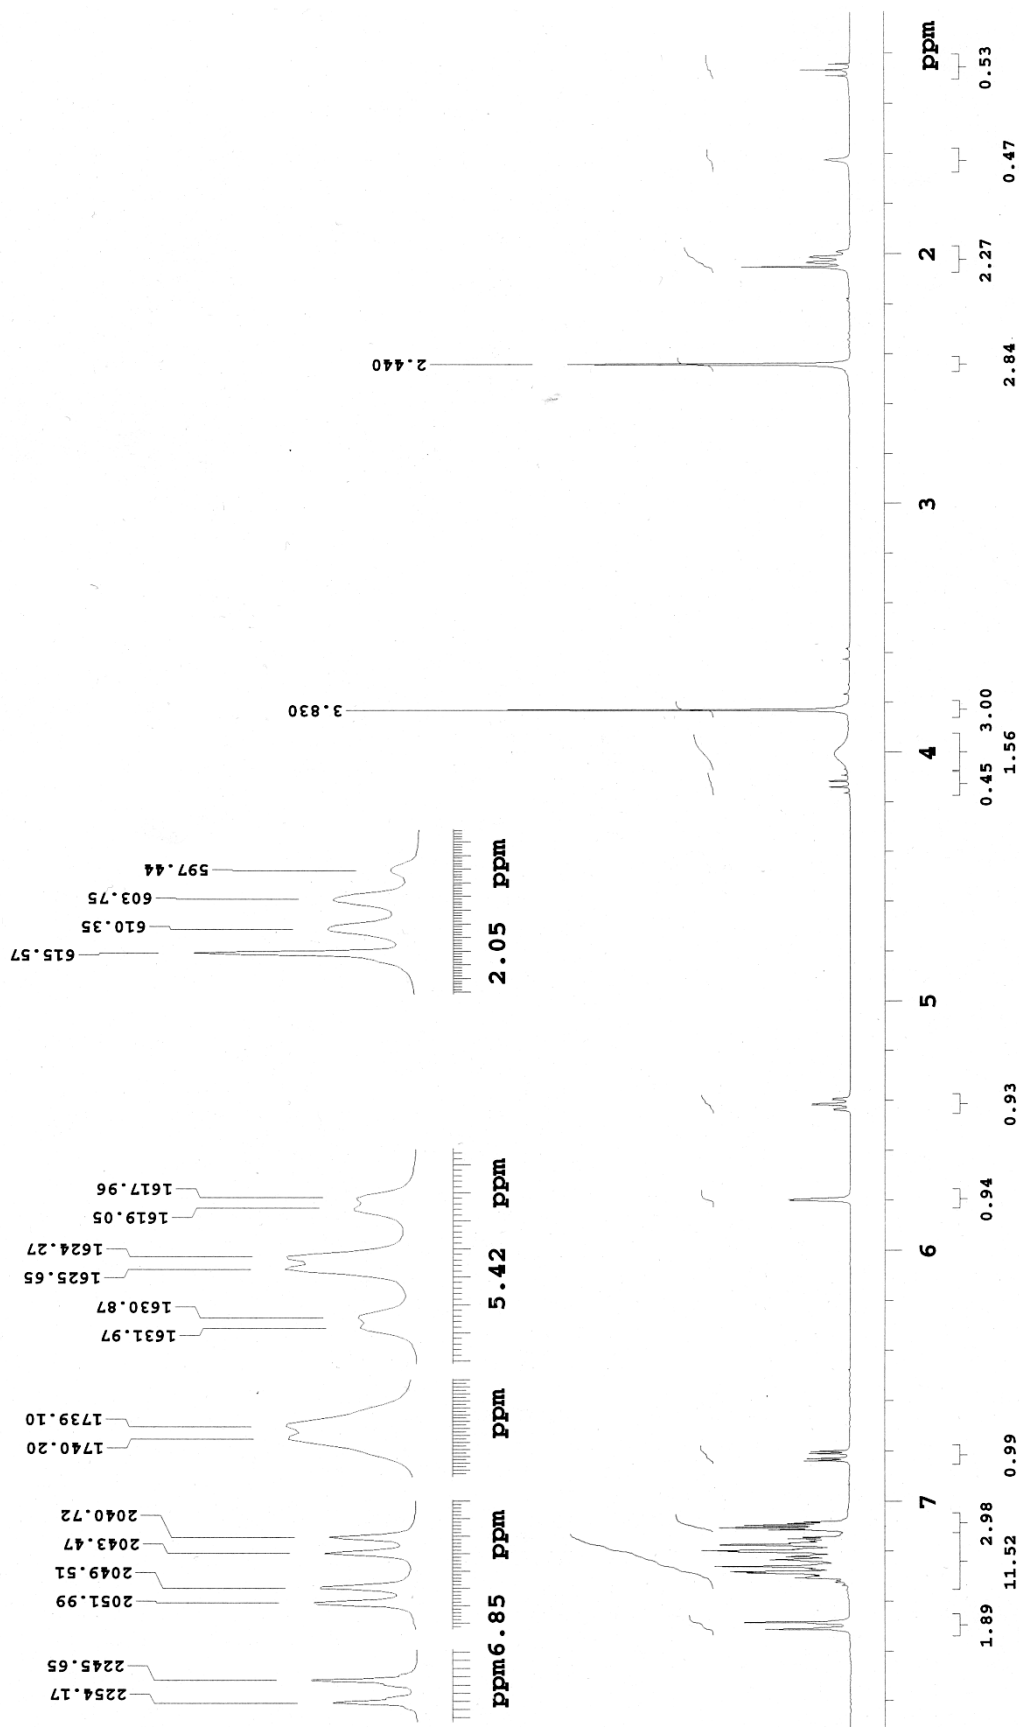

|                                                                                                                                   |                                                                                            |                                                                 |                                                                                                              |
|-----------------------------------------------------------------------------------------------------------------------------------|--------------------------------------------------------------------------------------------|-----------------------------------------------------------------|--------------------------------------------------------------------------------------------------------------|
| <b>PULSE SEQUENCE</b><br>Relax. delay 1.502 sec<br>Pulse 45.0 degrees<br>Acq. time 3.498 sec<br>Width 4500.5 Hz<br>24 repetitions | <b>OBSERVE</b> H1, 300.0836523                                                             | <b>DATA PROCESSING</b><br>F2 size 32768<br>Total time 2 minutes | <b>SM-III-74cr</b><br>Pulse Sequence: s2pul<br>Solvent: CDCl3<br>Ambient temperature<br>Mercury-300 "varian" |
|                                                                                                                                   | 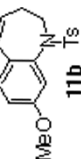<br>11b |                                                                 |                                                                                                              |

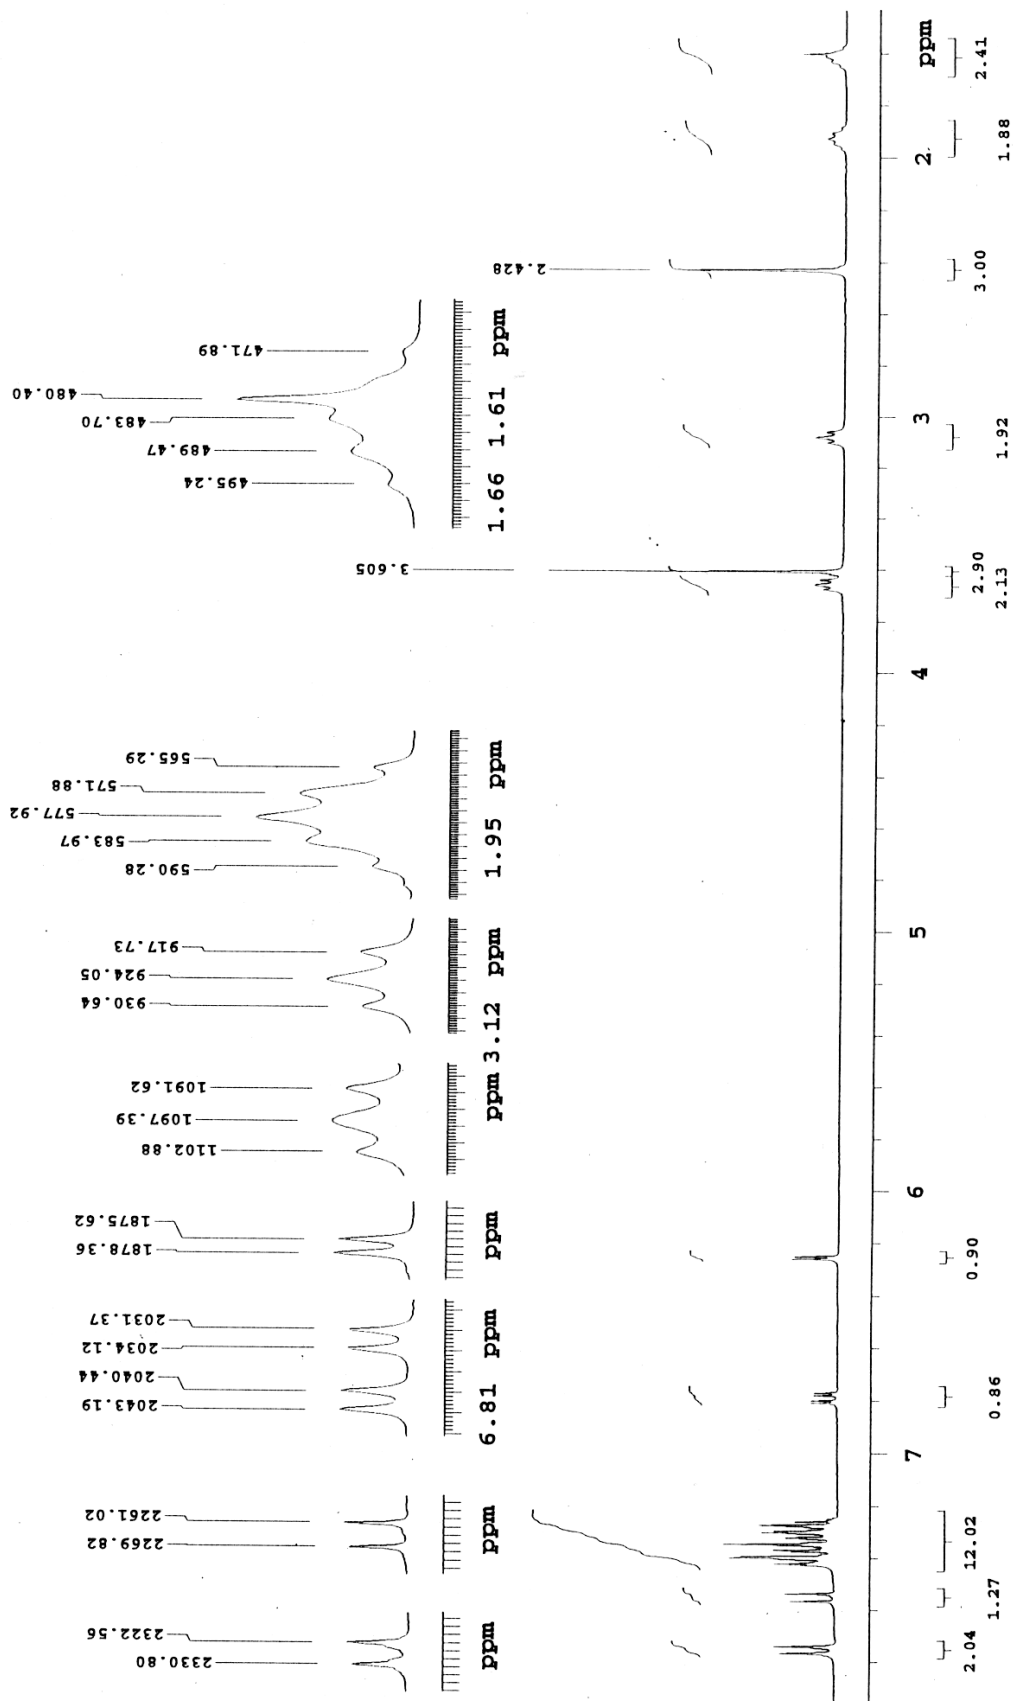

|                                                                                                                                   |                                |                                                                 |                                                                                                                                                 |
|-----------------------------------------------------------------------------------------------------------------------------------|--------------------------------|-----------------------------------------------------------------|-------------------------------------------------------------------------------------------------------------------------------------------------|
| <b>PULSE SEQUENCE</b><br>Relax. delay 1.502 sec<br>Pulse 45.0 degrees<br>Acq. time 3.498 sec<br>Width 4500.5 Hz<br>20 repetitions | <b>OBSERVE</b> H1, 300.0836539 | <b>DATA PROCESSING</b><br>FT size 32768<br>Total time 1 minutes | <b>SM-III-46A</b> 9 (#12)<br><b>Pulse Sequence:</b> s2pul<br><b>Solvent:</b> CDCl3<br><b>Ambient temperature</b><br><b>Mercury-300 "varian"</b> |
|-----------------------------------------------------------------------------------------------------------------------------------|--------------------------------|-----------------------------------------------------------------|-------------------------------------------------------------------------------------------------------------------------------------------------|

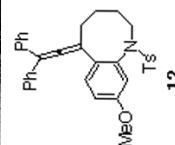

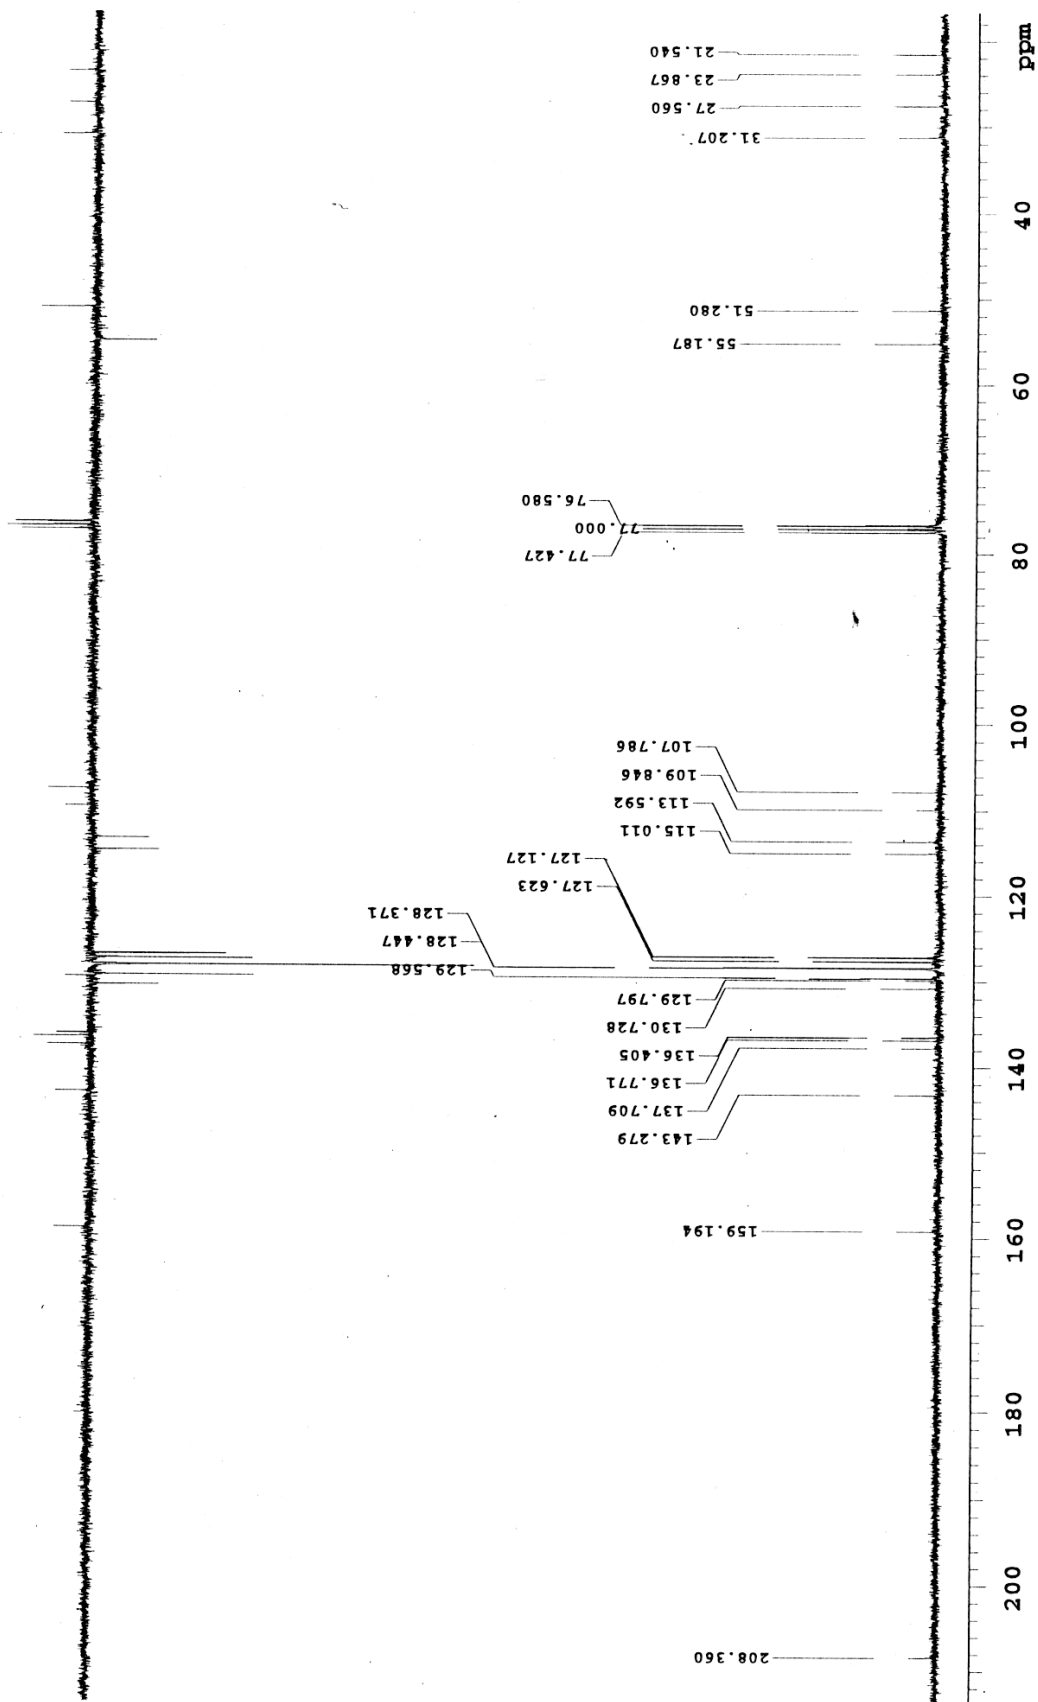

|                                                                                                                                                      |                                                                                                                            |                                                                                                        |                                                                                                                     |           |
|------------------------------------------------------------------------------------------------------------------------------------------------------|----------------------------------------------------------------------------------------------------------------------------|--------------------------------------------------------------------------------------------------------|---------------------------------------------------------------------------------------------------------------------|-----------|
| <p><b>PULSE SEQUENCE</b><br/> Relax. delay 0.501 sec<br/> Pulse 45.0 degrees<br/> Acq. time 1.499 sec<br/> Width 18865.6 Hz<br/> 208 repetitions</p> | <p>OBSERVE C13, 75.4560969<br/> DECOUPLE H1, 300.0851346<br/> Power 36 dB<br/> continuously on<br/> WALTZ-16 modulated</p> | <p><b>DATA PROCESSING</b><br/> Line broadening 1.0 Hz<br/> Ft size 85536<br/> Total time 6 minutes</p> | <p>SM-III-46A<br/> Pulse Sequence: s2pul<br/> Solvent: CDCl3<br/> Ambient temperature<br/> Mercury-300 "varian"</p> | <p>12</p> |
|------------------------------------------------------------------------------------------------------------------------------------------------------|----------------------------------------------------------------------------------------------------------------------------|--------------------------------------------------------------------------------------------------------|---------------------------------------------------------------------------------------------------------------------|-----------|

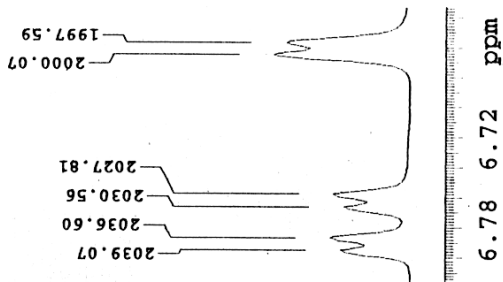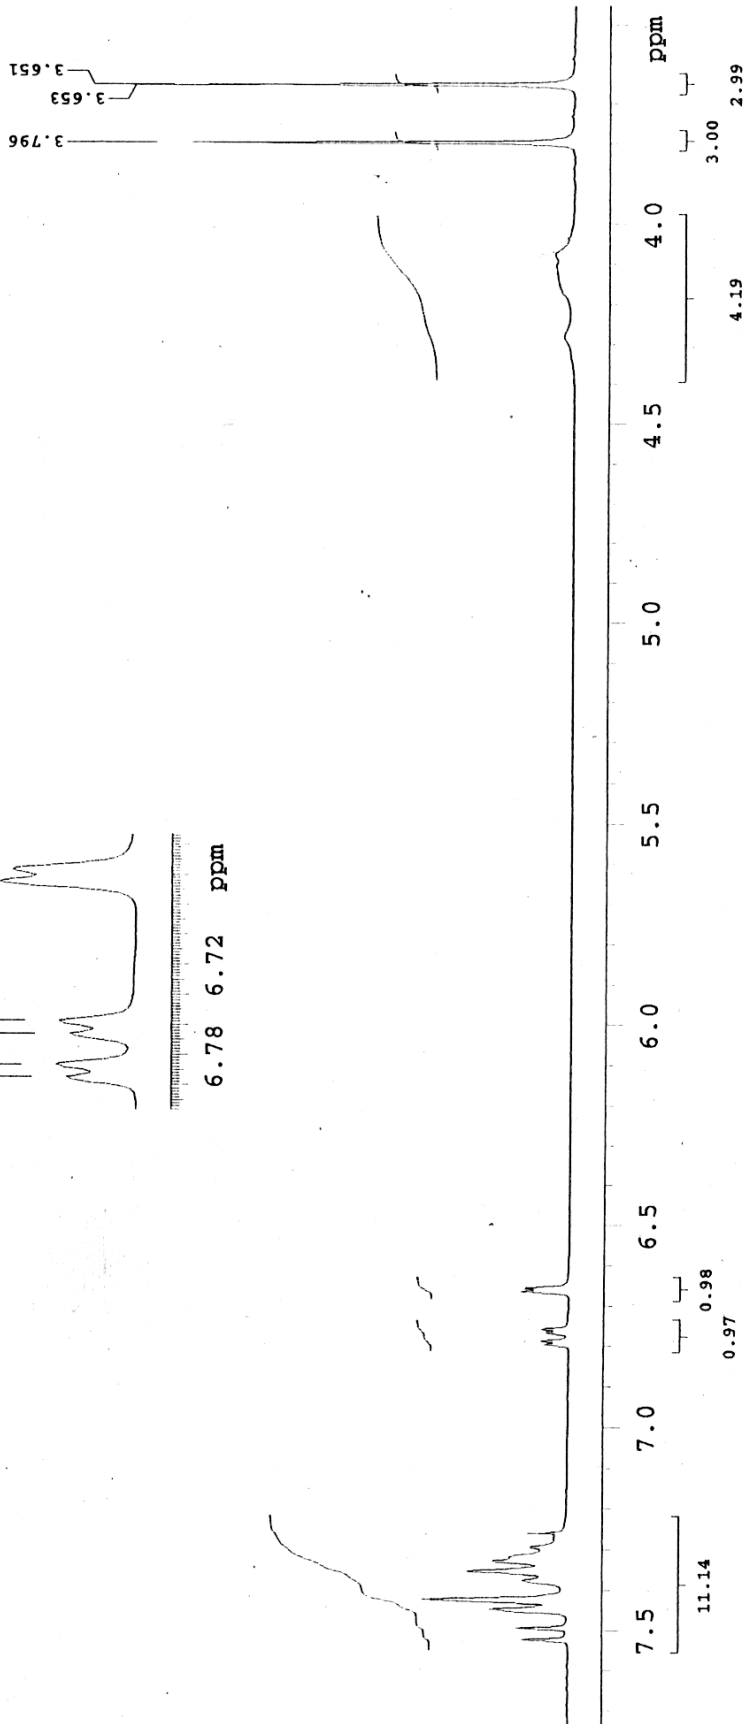

|                                                                                                                                   |                                |                                                                |                                                               |                                                                                                                        |
|-----------------------------------------------------------------------------------------------------------------------------------|--------------------------------|----------------------------------------------------------------|---------------------------------------------------------------|------------------------------------------------------------------------------------------------------------------------|
| <b>PULSE SEQUENCE</b><br>Relax. delay 1.502 sec<br>Pulse 45.0 degrees<br>Acq. time 3.498 sec<br>Width 4500.5 Hz<br>16 repetitions | <b>OBSERVE</b> H1, 300.0836523 | <b>DATA PROCESSING</b><br>Ft size 32768<br>Total time 1 minute | <chem>COc1ccc(cc1)/C(=C/c2ccccc2)N3CCOC3</chem><br><b>14a</b> | <b>SM-II-111A</b> <i>14a</i><br>Pulse Sequence: s2pul<br>Solvent: CDCl3<br>Ambient temperature<br>Mercury-300 "varian" |
|-----------------------------------------------------------------------------------------------------------------------------------|--------------------------------|----------------------------------------------------------------|---------------------------------------------------------------|------------------------------------------------------------------------------------------------------------------------|

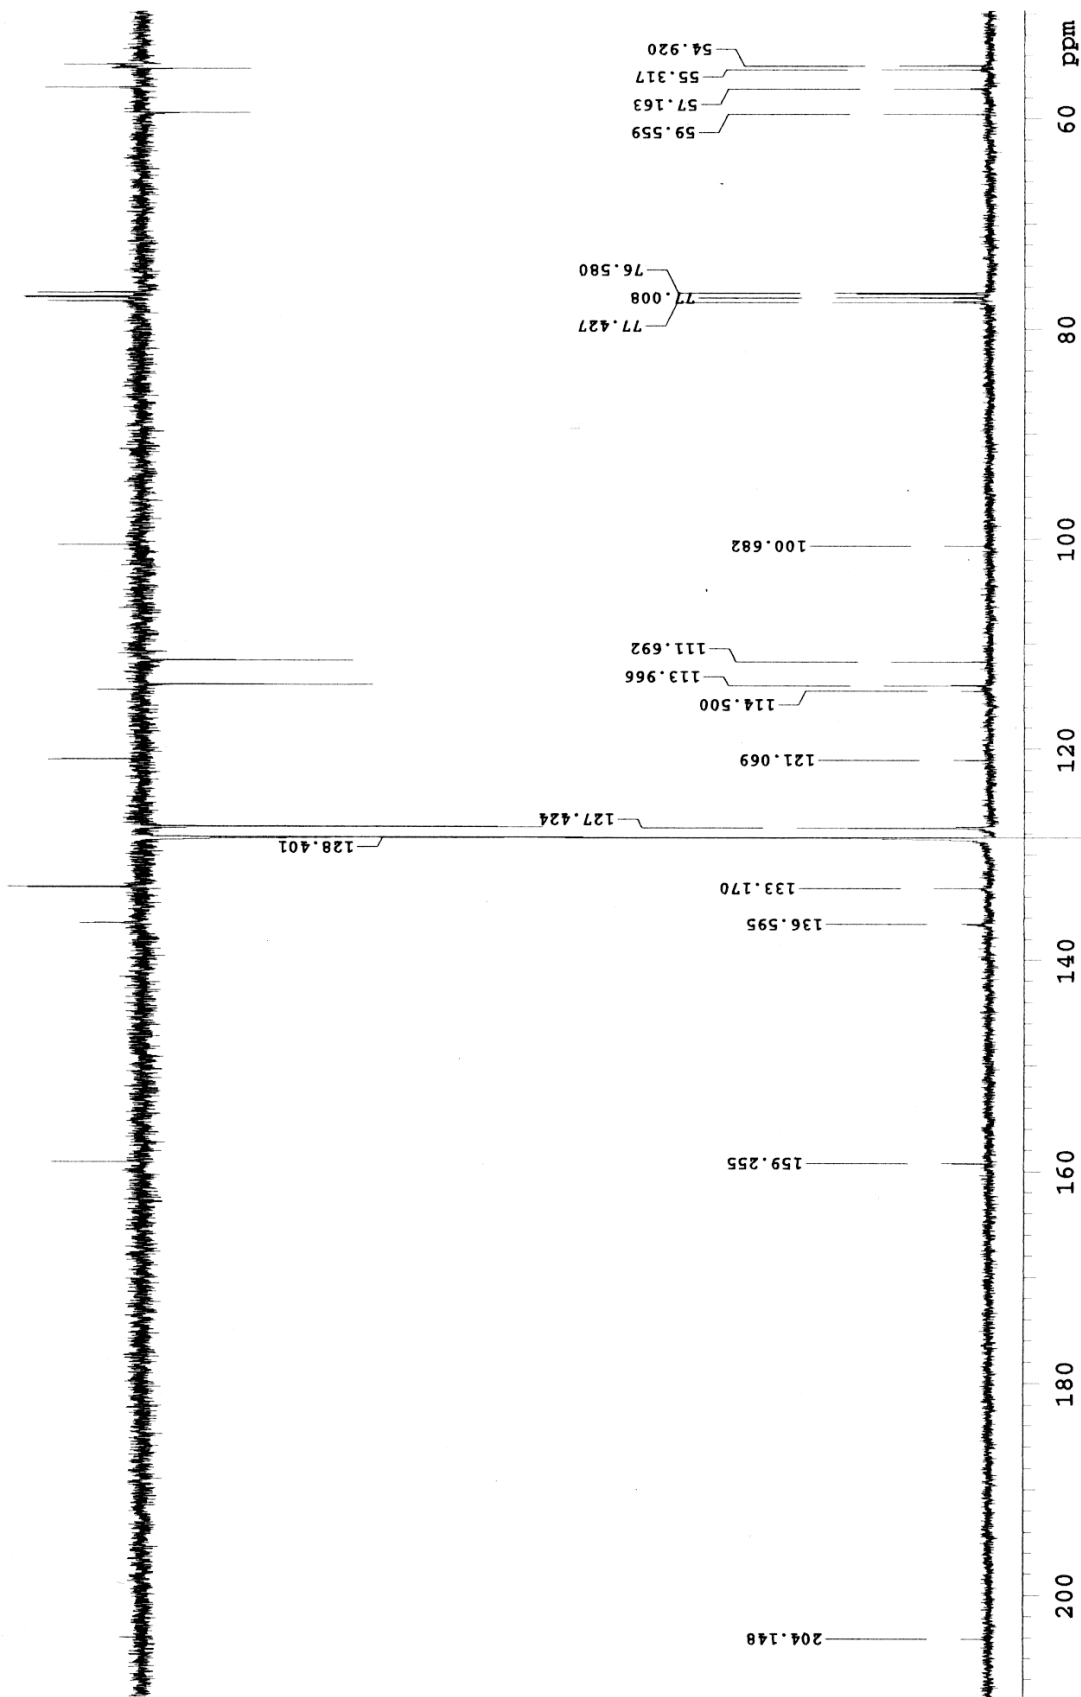

|                                                                                                                                                      |                                                                                                                            |                                                                                                        |                                                                                                                                        |                                                                                            |
|------------------------------------------------------------------------------------------------------------------------------------------------------|----------------------------------------------------------------------------------------------------------------------------|--------------------------------------------------------------------------------------------------------|----------------------------------------------------------------------------------------------------------------------------------------|--------------------------------------------------------------------------------------------|
| <p><b>PULSE SEQUENCE</b><br/> Relax. delay 0.501 sec<br/> Pulse 45.0 degrees<br/> Acq. time 1.499 sec<br/> Width 18865.6 Hz<br/> 128 repetitions</p> | <p>OBSERVE C13, 75.4560975<br/> DECOUPLE H1, 300.0851346<br/> Power 36 dB<br/> continuously on<br/> WALTZ-16 modulated</p> | <p><b>DATA PROCESSING</b><br/> Line broadening 1.0 Hz<br/> Ft size 65536<br/> Total time 4 minutes</p> | <p><b>13C OBSERVE</b><br/> Pulse Sequence: s2pul<br/> Solvent: CDCl<sub>3</sub><br/> Ambient temperature<br/> Mercury-300 "varian"</p> | <p><b>14a</b></p> <chem>COc1ccc2c(c1)CN(C2)C(=C3C=CC=C(C=C3)C4=CC=CC=C4)C5=CC=CC=C5</chem> |
|------------------------------------------------------------------------------------------------------------------------------------------------------|----------------------------------------------------------------------------------------------------------------------------|--------------------------------------------------------------------------------------------------------|----------------------------------------------------------------------------------------------------------------------------------------|--------------------------------------------------------------------------------------------|

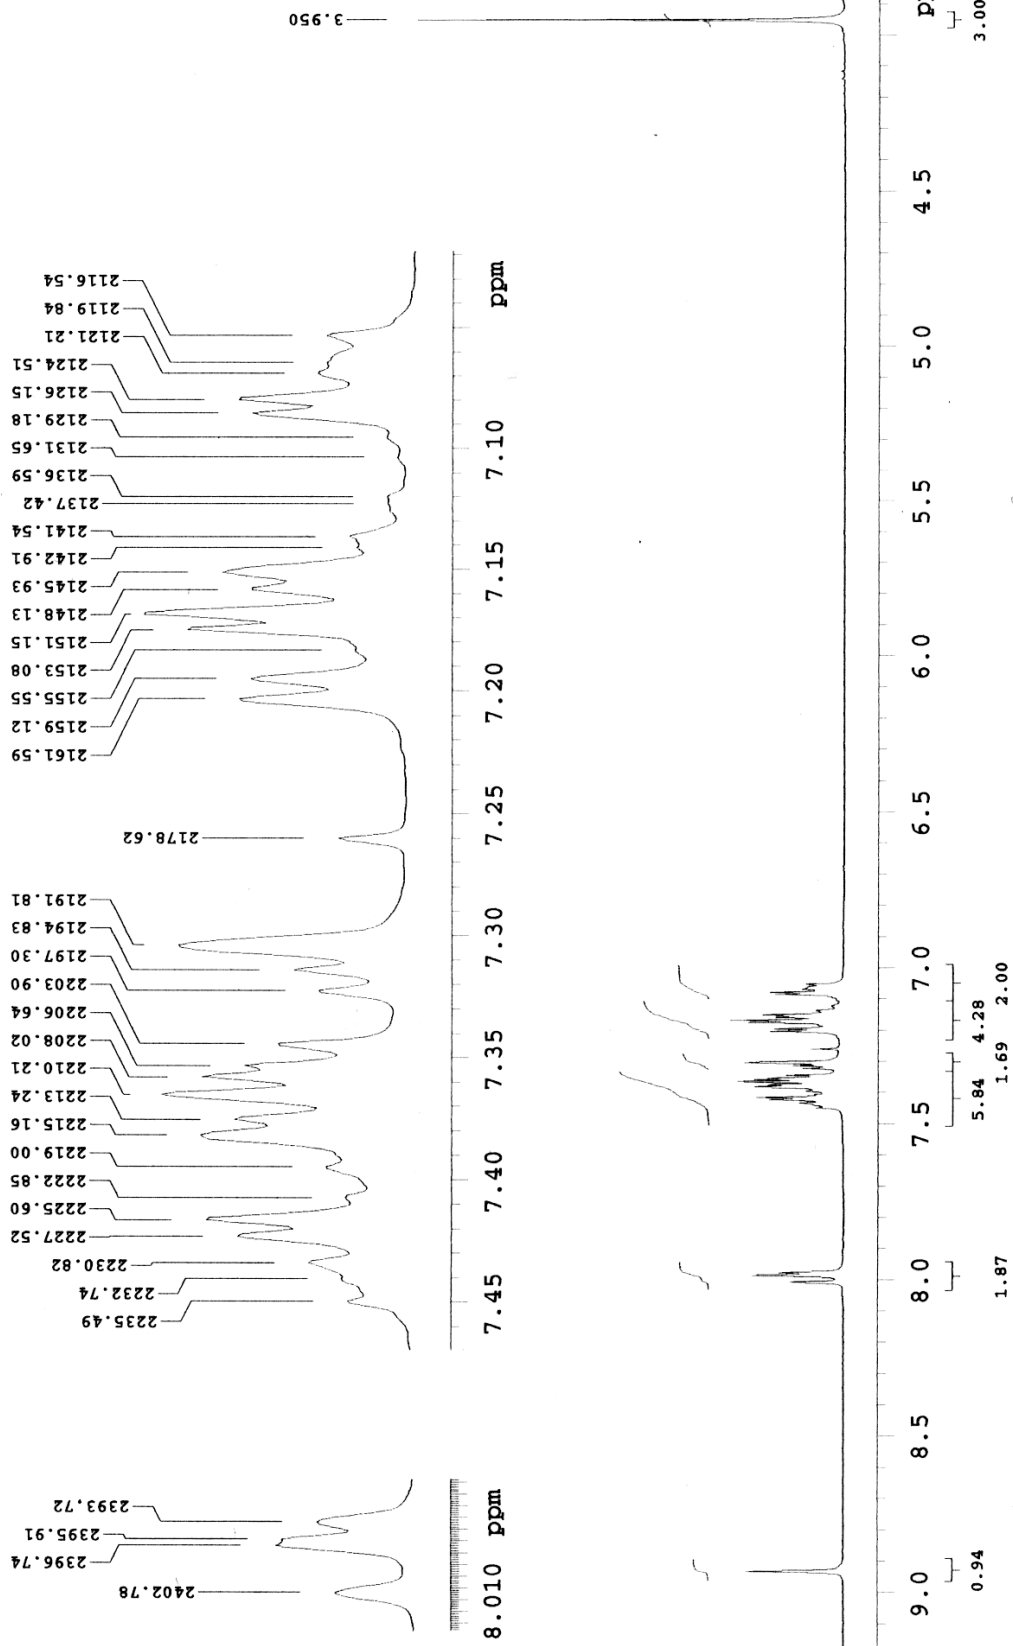

|                                                                                                                                   |                                |                                                                |                                                                                                   |                                                                                                                       |
|-----------------------------------------------------------------------------------------------------------------------------------|--------------------------------|----------------------------------------------------------------|---------------------------------------------------------------------------------------------------|-----------------------------------------------------------------------------------------------------------------------|
| <b>PULSE SEQUENCE</b><br>Relax. delay 1.502 sec<br>Pulse 45.0 degrees<br>Acq. time 3.498 sec<br>Width 4500.5 Hz<br>16 repetitions | <b>OBSERVE</b> H1, 300.0836523 | <b>DATA PROCESSING</b><br>FT size 32768<br>Total time 1 minute | 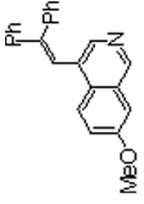<br><b>16a</b> | SM-II-112B 100 #6 12A<br>Pulse Sequence: s2pul 16(a)<br>Solvent: CDCl3<br>Ambient temperature<br>Mercury-300 "varian" |
|-----------------------------------------------------------------------------------------------------------------------------------|--------------------------------|----------------------------------------------------------------|---------------------------------------------------------------------------------------------------|-----------------------------------------------------------------------------------------------------------------------|

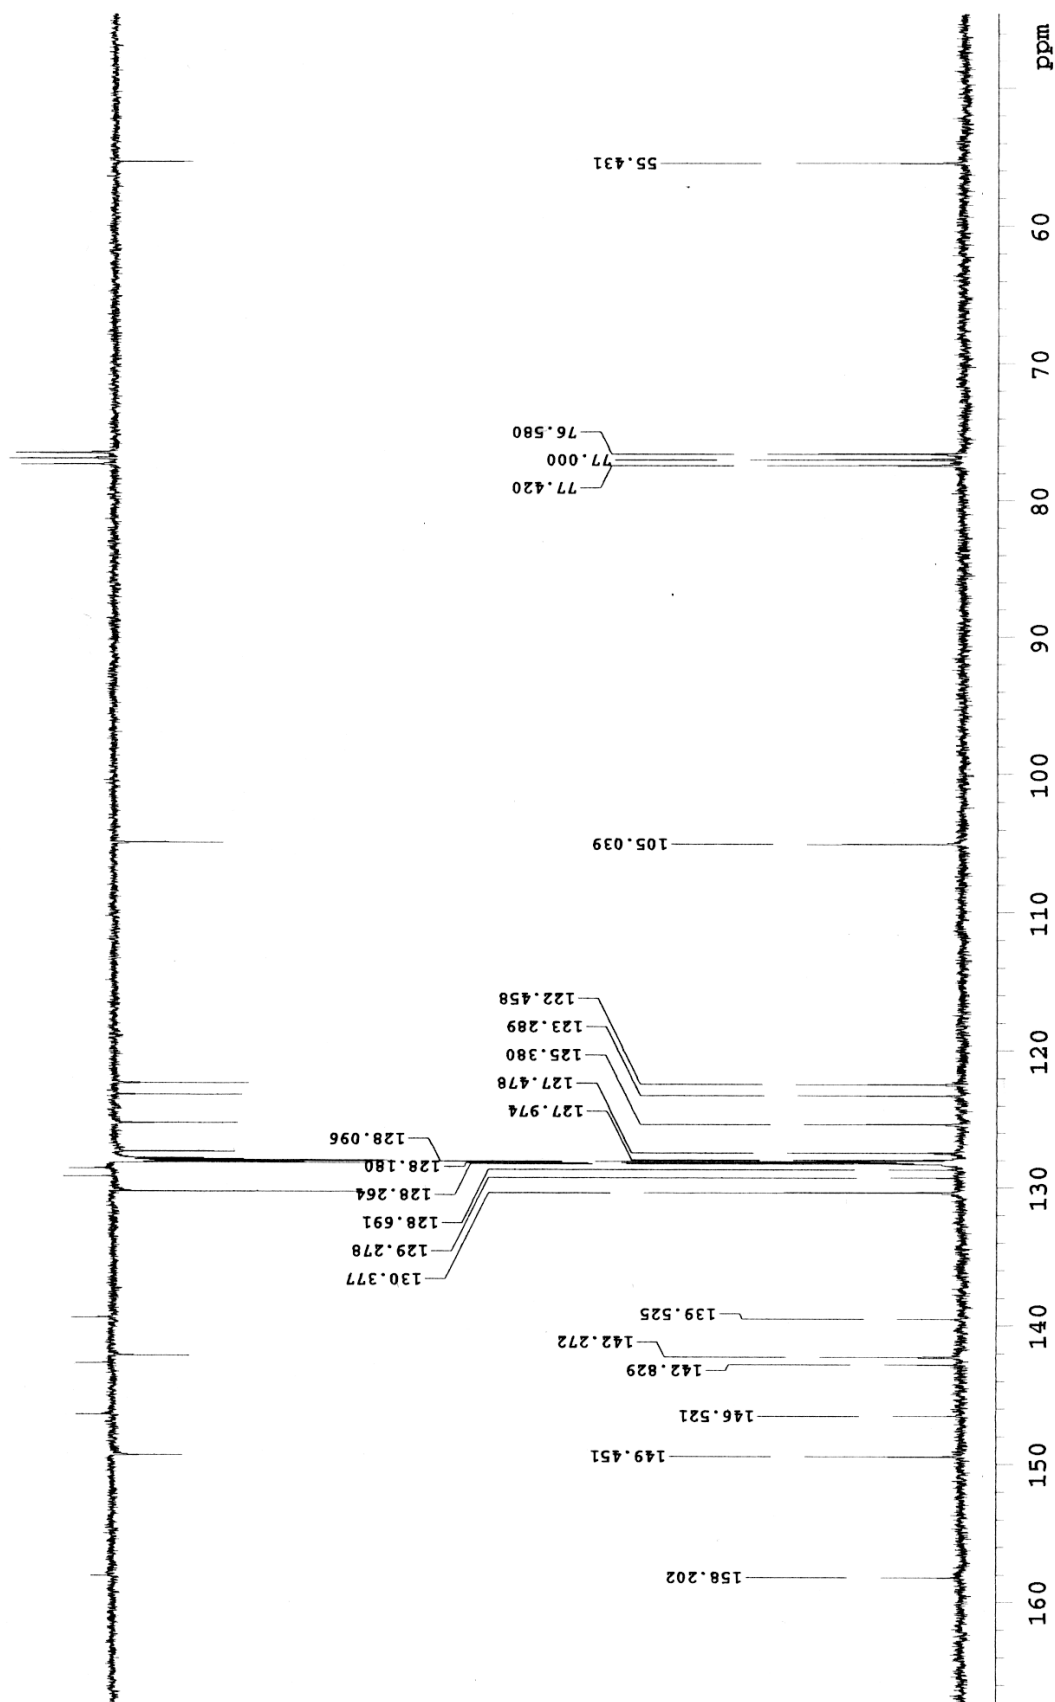

|                                                                                                                                                                                             |                                                                                                                                           |                                                                                                                                                                                  |
|---------------------------------------------------------------------------------------------------------------------------------------------------------------------------------------------|-------------------------------------------------------------------------------------------------------------------------------------------|----------------------------------------------------------------------------------------------------------------------------------------------------------------------------------|
| <p><b>PULSE SEQUENCE</b><br/>         Relax. delay 0.501 sec<br/>         Pulse 45.0 degrees<br/>         Acq. time 1.499 sec<br/>         Width 1865.6 Hz<br/>         224 repetitions</p> | <p><b>DATA PROCESSING</b><br/>         Line broadening 1.0 Hz<br/>         F<sub>T</sub> size 65536<br/>         Total time 7 minutes</p> | <p><b>SM-II-112B</b> <i>16a</i><br/>         Pulse sequence: s2pul<br/>         Solvent: CDCl<sub>3</sub><br/>         Ambient temperature<br/>         Mercury-300 "varian"</p> |
|---------------------------------------------------------------------------------------------------------------------------------------------------------------------------------------------|-------------------------------------------------------------------------------------------------------------------------------------------|----------------------------------------------------------------------------------------------------------------------------------------------------------------------------------|

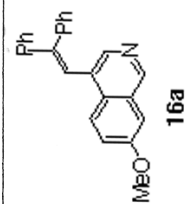

Supplement: Supplementary file 1 [file 5172289]
